# Supplementary material for: Global Synthesis of Drought Effects on Maize and Wheat Production
Source: PubMed Central journal article supplement (PMC4880198; doi:10.1371/journal.pone.0156362), 2016-05-25
Supplement: pone.0156362.s008.pdf [file pone.0156362.s008.pdf]

| type of plant | ratio of mean productivity during drought and during normal condition | country | continent     | dryland/non dryland agriculture (based on Koppen or | drought timing | ratio of water during drought and during normal condition | soil texture | author(s)             | year of publication |
|---------------|-----------------------------------------------------------------------|---------|---------------|-----------------------------------------------------|----------------|-----------------------------------------------------------|--------------|-----------------------|---------------------|
| wheat         | 0.61                                                                  | new     | australia     | non-dryland                                         | vegetative     | 0.62                                                      | coarse       | jamieson et al        | 1995                |
| wheat         | 0.63                                                                  | new     | australia     | non-dryland                                         | generative     | 0.58                                                      | coarse       | jamieson et al        | 1995                |
| maize         | 0.87                                                                  | new     | australia     | non-dryland                                         | vegetative     | 0.77                                                      | coarse       | jamieson et al        | 1995                |
| maize         | 0.79                                                                  | new     | australia     | non-dryland                                         | generative     | 0.59                                                      | coarse       | jamieson et al        | 1995                |
| maize         | 1.09                                                                  | new     | australia     | non-dryland                                         | generative     | 0.63                                                      | coarse       | jamieson et al        | 1995                |
| wheat         | 0.57                                                                  | egypt   | africa        | dryland                                             | throughout     | 0.33                                                      | n/a          | bayoumi et al         | 2008                |
| maize         | 0.38                                                                  | nigeria | africa        | dryland                                             | throughout     | n/a                                                       | fine         | kamara et al          | 2003                |
| maize         | 0.86                                                                  | USA     | north america | dryland                                             | throughout     | 0.61                                                      | medium       | wenda & hanks         | 1981                |
| maize         | 1.00                                                                  | USA     | north america | dryland                                             | throughout     | 0.60                                                      | medium       | wenda & hanks         | 1981                |
| maize         | 0.78                                                                  | USA     | north america | dryland                                             | throughout     | 0.61                                                      | medium       | wenda & hanks         | 1981                |
| maize         | 0.77                                                                  | USA     | north america | dryland                                             | throughout     | 0.58                                                      | medium       | wenda & hanks         | 1981                |
| maize         | 0.70                                                                  | USA     | north america | dryland                                             | throughout     | 0.38                                                      | medium       | wenda & hanks         | 1981                |
| maize         | 1.01                                                                  | USA     | north america | dryland                                             | generative     | 0.86                                                      | medium       | wenda & hanks         | 1981                |
| maize         | 1.06                                                                  | USA     | north america | dryland                                             | generative     | 0.84                                                      | medium       | wenda & hanks         | 1981                |
| maize         | 0.97                                                                  | USA     | north america | dryland                                             | generative     | 0.85                                                      | medium       | wenda & hanks         | 1981                |
| maize         | 0.96                                                                  | USA     | north america | dryland                                             | generative     | 0.87                                                      | medium       | wenda & hanks         | 1981                |
| maize         | 1.00                                                                  | USA     | north america | dryland                                             | generative     | 0.71                                                      | medium       | wenda & hanks         | 1981                |
| maize         | 0.72                                                                  | USA     | north america | dryland                                             | throughout     | 0.47                                                      | coarse       | wenda & hanks         | 1981                |
| maize         | 0.60                                                                  | USA     | north america | dryland                                             | throughout     | 0.47                                                      | coarse       | wenda & hanks         | 1981                |
| maize         | 0.51                                                                  | USA     | north america | dryland                                             | throughout     | 0.48                                                      | n/a          | wenda & hanks         | 1981                |
| maize         | 0.53                                                                  | USA     | north america | dryland                                             | throughout     | 0.46                                                      | coarse       | wenda & hanks         | 1981                |
| maize         | 0.71                                                                  | USA     | north america | dryland                                             | throughout     | 0.35                                                      | coarse       | wenda & hanks         | 1981                |
| maize         | 0.91                                                                  | USA     | north america | dryland                                             | throughout     | 0.75                                                      | n/a          | wenda & hanks         | 1981                |
| maize         | 0.82                                                                  | USA     | north america | dryland                                             | generative     | 0.75                                                      | coarse       | wenda & hanks         | 1981                |
| maize         | 0.72                                                                  | USA     | north america | dryland                                             | generative     | 0.76                                                      | coarse       | wenda & hanks         | 1981                |
| maize         | 0.80                                                                  | USA     | north america | dryland                                             | generative     | 0.73                                                      | n/a          | wenda & hanks         | 1981                |
| maize         | 0.91                                                                  | USA     | north america | dryland                                             | generative     | 0.67                                                      | coarse       | wenda & hanks         | 1981                |
| maize         | 0.39                                                                  | USA     | north america | dryland                                             | throughout     | 0.37                                                      | medium       | wenda & hanks         | 1981                |
| maize         | 0.37                                                                  | USA     | north america | dryland                                             | throughout     | 0.39                                                      | medium       | wenda & hanks         | 1981                |
| maize         | 0.33                                                                  | USA     | north america | dryland                                             | throughout     | 0.38                                                      | medium       | wenda & hanks         | 1981                |
| maize         | 0.26                                                                  | USA     | north america | dryland                                             | throughout     | 0.41                                                      | medium       | wenda & hanks         | 1981                |
| maize         | 0.36                                                                  | USA     | north america | dryland                                             | throughout     | 0.39                                                      | medium       | wenda & hanks         | 1981                |
| maize         | 0.88                                                                  | USA     | north america | dryland                                             | generative     | 0.69                                                      | medium       | wenda & hanks         | 1981                |
| maize         | 0.79                                                                  | USA     | north america | dryland                                             | generative     | 0.70                                                      | medium       | wenda & hanks         | 1981                |
| maize         | 0.69                                                                  | USA     | north america | dryland                                             | generative     | 0.71                                                      | medium       | wenda & hanks         | 1981                |
| maize         | 0.56                                                                  | USA     | north america | dryland                                             | generative     | 0.72                                                      | medium       | wenda & hanks         | 1981                |
| maize         | 0.61                                                                  | USA     | north america | dryland                                             | generative     | 0.70                                                      | medium       | wenda & hanks         | 1981                |
| wheat         | 0.79                                                                  | iran    | asia          | dryland                                             | throughout     | 0.48                                                      | n/a          | araghi & assad        | 1998                |
| wheat         | 0.50                                                                  | iran    | asia          | dryland                                             | generative     | 0.67                                                      | medium       | nouri-ganbalani et al | 2009                |
| maize         | 0.74                                                                  | lebanon | asia          | dryland                                             | throughout     | 0.60                                                      | fine         | karam et al           | 2003                |
| maize         | 0.81                                                                  | lebanon | asia          | dryland                                             | throughout     | 0.60                                                      | fine         | karam et al           | 2003                |
| wheat         | 1.38                                                                  | china   | asia          | dryland                                             | generative     | 0.87                                                      | medium       | zhang et al           | 2006                |
| wheat         | 1.36                                                                  | china   | asia          | dryland                                             | generative     | 0.77                                                      | medium       | zhang et al           | 2006                |
| wheat         | 1.36                                                                  | china   | asia          | dryland                                             | vegetative     | 0.85                                                      | medium       | zhang et al           | 2006                |
| wheat         | 1.15                                                                  | china   | asia          | dryland                                             | vegetative     | 0.85                                                      | medium       | zhang et al           | 2006                |
| wheat         | 1.03                                                                  | china   | asia          | dryland                                             | generative     | 0.77                                                      | medium       | zhang et al           | 2006                |
| wheat         | 1.00                                                                  | china   | asia          | dryland                                             | vegetative     | 0.81                                                      | medium       | zhang et al           | 2006                |
| maize         | 0.96                                                                  | turkey  | asia          | dryland                                             | vegetative     | 0.83                                                      | medium       | cakir                 | 2004                |
| maize         | 0.72                                                                  | turkey  | asia          | dryland                                             | generative     | 0.71                                                      | medium       | cakir                 | 2004                |
| maize         | 0.70                                                                  | turkey  | asia          | dryland                                             | generative     | 0.70                                                      | medium       | cakir                 | 2004                |
| maize         | 0.75                                                                  | turkey  | asia          | dryland                                             | generative     | 0.76                                                      | medium       | cakir                 | 2004                |
| maize         | 0.26                                                                  | turkey  | asia          | dryland                                             | generative     | 0.17                                                      | medium       | cakir                 | 2004                |
| maize         | 0.43                                                                  | turkey  | asia          | dryland                                             | throughout     | 0.29                                                      | medium       | cakir                 | 2004                |
| maize         | 0.51                                                                  | turkey  | asia          | dryland                                             | throughout     | 0.30                                                      | medium       | cakir                 | 2004                |
| maize         | 0.35                                                                  | turkey  | asia          | dryland                                             | throughout     | 0.24                                                      | medium       | cakir                 | 2004                |
| maize         | 0.88                                                                  | turkey  | asia          | dryland                                             | vegetative     | 0.78                                                      | medium       | cakir                 | 2004                |
| maize         | 0.51                                                                  | turkey  | asia          | dryland                                             | generative     | 0.68                                                      | medium       | cakir                 | 2004                |
| maize         | 0.74                                                                  | turkey  | asia          | dryland                                             | generative     | 0.74                                                      | medium       | cakir                 | 2004                |
| maize         | 0.72                                                                  | turkey  | asia          | dryland                                             | generative     | 0.76                                                      | medium       | cakir                 | 2004                |
| maize         | 0.07                                                                  | turkey  | asia          | dryland                                             | generative     | 0.19                                                      | medium       | cakir                 | 2004                |
| maize         | 0.44                                                                  | turkey  | asia          | dryland                                             | throughout     | 0.32                                                      | medium       | cakir                 | 2004                |
| maize         | 0.37                                                                  | turkey  | asia          | dryland                                             | throughout     | 0.26                                                      | medium       | cakir                 | 2004                |
| maize         | 0.10                                                                  | turkey  | asia          | dryland                                             | throughout     | 0.24                                                      | medium       | cakir                 | 2004                |
| maize         | 0.89                                                                  | turkey  | asia          | dryland                                             | vegetative     | 0.85                                                      | medium       | cakir                 | 2004                |
| maize         | 0.85                                                                  | turkey  | asia          | dryland                                             | generative     | 0.61                                                      | medium       | cakir                 | 2004                |
| maize         | 0.83                                                                  | turkey  | asia          | dryland                                             | generative     | 0.76                                                      | medium       | cakir                 | 2004                |
| maize         | 0.86                                                                  | turkey  | asia          | dryland                                             | generative     | 0.78                                                      | medium       | cakir                 | 2004                |
| maize         | 0.56                                                                  | turkey  | asia          | dryland                                             | generative     | 0.15                                                      | medium       | cakir                 | 2004                |
| maize         | 0.79                                                                  | turkey  | asia          | dryland                                             | throughout     | 0.39                                                      | medium       | cakir                 | 2004                |
| maize         | 0.71                                                                  | turkey  | asia          | dryland                                             | throughout     | 0.24                                                      | medium       | cakir                 | 2004                |
| maize         | 0.71                                                                  | turkey  | asia          | dryland                                             | throughout     | 0.22                                                      | medium       | cakir                 | 2004                |
| wheat         | 0.86                                                                  | india   | asia          | dryland                                             | vegetative     | n/a                                                       | coarse       | singh & malik         | 1983                |
| wheat         | 0.76                                                                  | india   | asia          | dryland                                             | vegetative     | n/a                                                       | coarse       | singh & malik         | 1983                |
| wheat         | 0.65                                                                  | india   | asia          | dryland                                             | vegetative     | n/a                                                       | coarse       | singh & malik         | 1983                |
| wheat         | 0.90                                                                  | india   | asia          | dryland                                             | vegetative     | n/a                                                       | coarse       | singh & malik         | 1983                |

|       |      |           |               |             |            |      |        |                    |      |
|-------|------|-----------|---------------|-------------|------------|------|--------|--------------------|------|
| wheat | 0.82 | india     | asia          | dryland     | generative | n/a  | coarse | singh & malik      | 1983 |
| wheat | 0.72 | india     | asia          | dryland     | generative | n/a  | coarse | singh & malik      | 1983 |
| wheat | 0.94 | india     | asia          | dryland     | generative | n/a  | coarse | singh & malik      | 1983 |
| wheat | 0.84 | india     | asia          | dryland     | generative | n/a  | coarse | singh & malik      | 1983 |
| wheat | 0.75 | india     | asia          | dryland     | generative | n/a  | coarse | singh & malik      | 1983 |
| wheat | 0.87 | india     | asia          | dryland     | vegetative | n/a  | coarse | singh & malik      | 1983 |
| wheat | 0.76 | india     | asia          | dryland     | vegetative | n/a  | coarse | singh & malik      | 1983 |
| wheat | 0.66 | india     | asia          | dryland     | vegetative | n/a  | coarse | singh & malik      | 1983 |
| wheat | 0.91 | india     | asia          | dryland     | vegetative | n/a  | coarse | singh & malik      | 1983 |
| wheat | 0.83 | india     | asia          | dryland     | generative | n/a  | coarse | singh & malik      | 1983 |
| wheat | 0.74 | india     | asia          | dryland     | generative | n/a  | coarse | singh & malik      | 1983 |
| wheat | 0.96 | india     | asia          | dryland     | generative | n/a  | coarse | singh & malik      | 1983 |
| wheat | 0.86 | india     | asia          | dryland     | generative | n/a  | coarse | singh & malik      | 1983 |
| wheat | 0.79 | india     | asia          | dryland     | generative | n/a  | coarse | singh & malik      | 1983 |
| wheat | 0.74 | iran      | asia          | dryland     | generative | n/a  | medium | johari-pirevatlou  | 2010 |
| wheat | 0.70 | iran      | asia          | dryland     | generative | n/a  | coarse | ahmad et al        | 2003 |
| maize | 1.04 | turkey    | asia          | dryland     | throughout | 0.88 | fine   | oktem              | 2006 |
| maize | 0.84 | turkey    | asia          | dryland     | throughout | 0.82 | fine   | oktem              | 2006 |
| maize | 0.76 | turkey    | asia          | dryland     | throughout | 0.73 | fine   | oktem              | 2006 |
| maize | 1.08 | turkey    | asia          | dryland     | throughout | 0.91 | fine   | oktem              | 2006 |
| maize | 0.92 | turkey    | asia          | dryland     | throughout | 0.78 | fine   | oktem              | 2006 |
| maize | 0.78 | turkey    | asia          | dryland     | throughout | 0.70 | fine   | oktem              | 2006 |
| maize | 1.01 | china     | asia          | dryland     | throughout | 0.82 | medium | zhang et al        | 2004 |
| maize | 0.57 | china     | asia          | dryland     | throughout | 0.76 | medium | zhang et al        | 2004 |
| wheat | 1.09 | china     | asia          | dryland     | generative | 0.62 | medium | zhang et al        | 2004 |
| wheat | 1.05 | china     | asia          | dryland     | generative | 0.66 | medium | zhang et al        | 2004 |
| wheat | 0.92 | china     | asia          | dryland     | generative | 0.71 | medium | zhang et al        | 2004 |
| wheat | 0.98 | china     | asia          | dryland     | vegetative | 0.62 | medium | zhang et al        | 2004 |
| wheat | 1.07 | china     | asia          | dryland     | vegetative | 0.66 | medium | zhang et al        | 2004 |
| wheat | 0.96 | china     | asia          | dryland     | vegetative | 0.71 | medium | zhang et al        | 2004 |
| wheat | 0.99 | china     | asia          | dryland     | vegetative | 0.62 | medium | zhang et al        | 2004 |
| wheat | 1.03 | china     | asia          | dryland     | vegetative | 0.66 | medium | zhang et al        | 2004 |
| wheat | 0.94 | china     | asia          | dryland     | vegetative | 0.71 | medium | zhang et al        | 2004 |
| maize | 0.95 | USA       | north america | dryland     | throughout | 0.86 | medium | payero et al       | 2008 |
| maize | 1.04 | USA       | north america | dryland     | throughout | 0.62 | medium | payero et al       | 2008 |
| maize | 0.98 | USA       | north america | dryland     | throughout | 0.62 | medium | payero et al       | 2008 |
| maize | 0.90 | USA       | north america | dryland     | throughout | 0.43 | medium | payero et al       | 2008 |
| maize | 0.90 | USA       | north america | dryland     | throughout | 0.29 | medium | payero et al       | 2008 |
| maize | 0.87 | USA       | north america | dryland     | throughout | 0.21 | medium | payero et al       | 2008 |
| maize | 0.81 | USA       | north america | dryland     | throughout | 0.15 | medium | payero et al       | 2008 |
| maize | 0.99 | USA       | north america | dryland     | throughout | 0.87 | medium | payero et al       | 2008 |
| maize | 1.03 | USA       | north america | dryland     | throughout | 0.77 | medium | payero et al       | 2008 |
| maize | 1.02 | USA       | north america | dryland     | throughout | 0.81 | medium | payero et al       | 2008 |
| maize | 0.94 | USA       | north america | dryland     | throughout | 0.58 | medium | payero et al       | 2008 |
| maize | 0.87 | USA       | north america | dryland     | throughout | 0.43 | medium | payero et al       | 2008 |
| maize | 0.76 | USA       | north america | dryland     | throughout | 0.29 | medium | payero et al       | 2008 |
| maize | 0.49 | USA       | north america | dryland     | throughout | 0.10 | medium | payero et al       | 2008 |
| maize | 0.00 | australia | australia     | non-dryland | generative | 0.58 | medium | muchow             | 1989 |
| maize | 0.11 | australia | australia     | non-dryland | generative | 0.67 | medium | muchow             | 1989 |
| maize | 0.96 | australia | australia     | non-dryland | generative | 0.85 | medium | muchow             | 1989 |
| maize | 0.73 | australia | australia     | non-dryland | generative | 0.42 | medium | muchow             | 1989 |
| maize | 0.68 | australia | australia     | non-dryland | vegetative | 0.52 | medium | muchow             | 1989 |
| maize | 0.22 | australia | australia     | non-dryland | generative | 0.22 | medium | muchow             | 1989 |
| maize | 0.81 | spain     | europa        | dryland     | throughout | 0.86 | coarse | farre & faci       | 2006 |
| maize | 0.44 | spain     | europa        | dryland     | throughout | 0.68 | coarse | farre & faci       | 2006 |
| maize | 0.18 | spain     | europa        | dryland     | throughout | 0.50 | coarse | farre & faci       | 2006 |
| maize | 0.05 | spain     | europa        | dryland     | throughout | 0.18 | coarse | farre & faci       | 2006 |
| maize | 0.01 | spain     | europa        | dryland     | throughout | 0.36 | coarse | farre & faci       | 2006 |
| maize | 0.81 | spain     | europa        | dryland     | throughout | 0.86 | coarse | farre & faci       | 2006 |
| maize | 0.51 | spain     | europa        | dryland     | throughout | 0.68 | coarse | farre & faci       | 2006 |
| maize | 0.33 | spain     | europa        | dryland     | throughout | 0.50 | coarse | farre & faci       | 2006 |
| maize | 0.23 | spain     | europa        | dryland     | throughout | 0.18 | coarse | farre & faci       | 2006 |
| maize | 0.17 | spain     | europa        | dryland     | throughout | 0.36 | coarse | farre & faci       | 2006 |
| maize | 0.84 | argentina | south america | non-dryland | generative | n/a  | medium | otegui et al       | 1995 |
| maize | 0.89 | argentina | south america | non-dryland | generative | n/a  | medium | otegui et al       | 1995 |
| maize | 0.83 | argentina | south america | non-dryland | generative | n/a  | medium | otegui et al       | 1995 |
| maize | 0.96 | argentina | south america | non-dryland | generative | n/a  | medium | otegui et al       | 1995 |
| maize | 0.84 | australia | australia     | non-dryland | vegetative | 0.90 | medium | abretch & carberry | 1993 |
| maize | 1.00 | australia | australia     | non-dryland | vegetative | 0.77 | medium | abretch & carberry | 1993 |
| maize | 0.93 | australia | australia     | non-dryland | vegetative | 0.59 | medium | abretch & carberry | 1993 |
| maize | 0.01 | USA       | north america | non-dryland | generative | 0.96 | coarse | nesmith & ritchie  | 1992 |
| maize | 0.10 | USA       | north america | non-dryland | generative | 0.81 | coarse | nesmith & ritchie  | 1992 |
| maize | 0.00 | USA       | north america | non-dryland | generative | 0.60 | coarse | nesmith & ritchie  | 1992 |
| maize | 0.77 | USA       | north america | dryland     | throughout | 0.84 | medium | lyod et al         | 1995 |
| maize | 0.89 | USA       | north america | dryland     | throughout | 0.79 | medium | lyod et al         | 1995 |
| maize | 0.58 | india     | asia          | dryland     | throughout | 0.69 | coarse | singh & singh      | 1995 |
| maize | 0.52 | india     | asia          | dryland     | throughout | 0.46 | coarse | singh & singh      | 1995 |
| maize | 0.33 | india     | asia          | dryland     | throughout | 0.27 | coarse | singh & singh      | 1995 |
| wheat | 0.77 | india     | asia          | dryland     | vegetative | 0.96 | coarse | choudury & kumar   | 1980 |
| wheat | 0.80 | india     | asia          | dryland     | vegetative | 0.93 | coarse | choudury & kumar   | 1980 |

|       |      |           |               |             |            |      |        |                    |       |
|-------|------|-----------|---------------|-------------|------------|------|--------|--------------------|-------|
| wheat | 0.85 | india     | asia          | dryland     | generative | 0.92 | coarse | choudury & kumar   | 1980  |
| wheat | 0.83 | india     | asia          | dryland     | generative | 0.91 | coarse | choudury & kumar   | 1980  |
| wheat | 0.95 | india     | asia          | dryland     | generative | 0.95 | coarse | choudury & kumar   | 1980  |
| wheat | 0.76 | india     | asia          | dryland     | generative | 0.94 | coarse | choudury & kumar   | 1980  |
| wheat | 0.80 | india     | asia          | dryland     | vegetative | 0.96 | coarse | choudury & kumar   | 1980  |
| wheat | 0.67 | india     | asia          | dryland     | vegetative | 0.93 | coarse | choudury & kumar   | 1980  |
| wheat | 0.86 | india     | asia          | dryland     | generative | 0.92 | coarse | choudury & kumar   | 1980  |
| wheat | 0.90 | india     | asia          | dryland     | generative | 0.91 | coarse | choudury & kumar   | 1980  |
| wheat | 0.69 | india     | asia          | dryland     | generative | 0.95 | coarse | choudury & kumar   | 1980  |
| wheat | 0.76 | india     | asia          | dryland     | generative | 0.94 | coarse | choudury & kumar   | 1980  |
| maize | 0.88 | turkey    | asia          | non-dryland | throughout | 0.79 | fine   | irmak et al        | 2000  |
| maize | 0.75 | turkey    | asia          | non-dryland | throughout | 0.83 | fine   | irmak et al        | 2000  |
| maize | 0.12 | turkey    | asia          | non-dryland | throughout | 0.15 | fine   | irmak et al        | 2000  |
| wheat | 0.82 | china     | asia          | non-dryland | throughout | 0.50 | medium | zhang et al        | 1998  |
| wheat | 0.50 | china     | asia          | non-dryland | throughout | 0.33 | medium | zhang et al        | 1998  |
| wheat | 0.92 | china     | asia          | non-dryland | throughout | 0.49 | medium | zhang et al        | 1998  |
| wheat | 0.55 | china     | asia          | non-dryland | throughout | 0.32 | medium | zhang et al        | 1998  |
| maize | 0.79 | USA       | north america | non-dryland | vegetative | 0.71 | coarse | NeSmith & Ritchie  | 1992c |
| maize | 0.87 | USA       | north america | non-dryland | vegetative | 0.79 | coarse | NeSmith & Ritchie  | 1992c |
| maize | 0.75 | italy     | europa        | dryland     | throughout | n/a  | medium | katerji et al      | 2004  |
| maize | 0.55 | italy     | europa        | dryland     | throughout | n/a  | medium | katerji et al      | 2004  |
| maize | 0.83 | italy     | europa        | dryland     | throughout | n/a  | medium | katerji et al      | 2004  |
| maize | 0.60 | italy     | europa        | dryland     | throughout | n/a  | medium | katerji et al      | 2004  |
| wheat | 0.80 | india     | asia          | dryland     | throughout | 0.47 | n/a    | aggarwal et al     | 1986  |
| maize | 0.71 | mexico    | south america | dryland     | throughout | n/a  | n/a    | fischer et al      | 1989  |
| maize | 0.25 | mexico    | south america | dryland     | throughout | n/a  | n/a    | fischer et al      | 1989  |
| maize | 0.52 | australia | australia     | non-dryland | throughout | 0.20 | n/a    | inthapan & fukai   | 1988  |
| maize | 0.73 | USA       | north america | non-dryland | generative | 0.88 | fine   | harder et al       | 1982  |
| maize | 0.74 | USA       | north america | non-dryland | generative | 0.90 | fine   | harder et al       | 1982  |
| maize | 0.67 | USA       | north america | non-dryland | generative | 0.81 | fine   | harder et al       | 1982  |
| maize | 0.67 | USA       | north america | non-dryland | generative | 0.81 | fine   | harder et al       | 1982  |
| maize | 0.64 | USA       | north america | non-dryland | generative | 0.78 | fine   | harder et al       | 1982  |
| maize | 0.59 | USA       | north america | non-dryland | generative | 0.72 | fine   | harder et al       | 1982  |
| maize | 0.85 | USA       | north america | non-dryland | generative | 0.85 | fine   | harder et al       | 1982  |
| maize | 0.69 | USA       | north america | non-dryland | generative | 0.70 | fine   | harder et al       | 1982  |
| maize | 0.69 | USA       | north america | non-dryland | generative | 0.69 | fine   | harder et al       | 1982  |
| wheat | 0.76 | iran      | asia          | dryland     | vegetative | n/a  | medium | maralian et al     | 2010  |
| wheat | 0.53 | iran      | asia          | dryland     | generative | n/a  | medium | maralian et al     | 2010  |
| maize | 0.98 | nigeria   | afrika        | non-dryland | throughout | 0.88 | medium | fapohunda et al    | 1984  |
| maize | 0.84 | nigeria   | afrika        | non-dryland | throughout | 0.80 | medium | fapohunda et al    | 1984  |
| maize | 0.68 | nigeria   | afrika        | non-dryland | throughout | 0.76 | medium | fapohunda et al    | 1984  |
| maize | 0.53 | nigeria   | afrika        | non-dryland | throughout | 0.72 | medium | fapohunda et al    | 1984  |
| maize | 0.45 | nigeria   | afrika        | non-dryland | throughout | 0.71 | medium | fapohunda et al    | 1984  |
| wheat | 0.31 | turkey    | asia          | dryland     | throughout | n/a  | medium | ackura et al       | 2011  |
| wheat | 0.56 | turkey    | asia          | dryland     | throughout | n/a  | medium | ackura et al       | 2011  |
| wheat | 0.22 | USA       | north america | dryland     | throughout | 0.60 | medium | pradhan et al      | 2014  |
| wheat | 0.20 | USA       | north america | dryland     | throughout | 0.80 | medium | pradhan et al      | 2014  |
| wheat | 0.82 | pakistan  | asia          | dryland     | vegetative | n/a  | n/a    | akram              | 2011  |
| wheat | 0.92 | pakistan  | asia          | dryland     | generative | n/a  | n/a    | akram              | 2011  |
| wheat | 0.78 | pakistan  | asia          | dryland     | generative | n/a  | n/a    | akram              | 2011  |
| maize | 0.66 | poland    | europa        | non-dryland | throughout | 0.36 | medium | Grzeiak et al      | 2012  |
| maize | 0.97 | USA       | north america | dryland     | throughout | 0.88 | medium | Lamm et al         | 1995  |
| maize | 0.88 | USA       | north america | dryland     | throughout | 0.73 | medium | Lamm et al         | 1995  |
| maize | 0.79 | USA       | north america | dryland     | throughout | 0.52 | medium | Lamm et al         | 1995  |
| maize | 0.70 | USA       | north america | dryland     | throughout | 0.49 | medium | Lamm et al         | 1995  |
| maize | 0.87 | USA       | north america | dryland     | throughout | 0.90 | medium | Lamm et al         | 1995  |
| maize | 0.76 | USA       | north america | dryland     | throughout | 0.58 | medium | Lamm et al         | 1995  |
| maize | 0.57 | USA       | north america | dryland     | throughout | 0.51 | medium | Lamm et al         | 1995  |
| maize | 0.43 | USA       | north america | dryland     | throughout | 0.47 | medium | Lamm et al         | 1995  |
| maize | 0.97 | USA       | north america | dryland     | throughout | 0.93 | medium | Lamm et al         | 1995  |
| maize | 0.74 | USA       | north america | dryland     | throughout | 0.57 | medium | Lamm et al         | 1995  |
| maize | 0.46 | USA       | north america | dryland     | throughout | 0.51 | medium | Lamm et al         | 1995  |
| maize | 0.29 | USA       | north america | dryland     | throughout | 0.44 | medium | Lamm et al         | 1995  |
| wheat | 0.71 | iran      | asia          | dryland     | throughout | n/a  | medium | fadsafar & elyasi  | 2012  |
| wheat | 0.88 | zimbabwe  | afrika        | dryland     | throughout | 0.82 | fine   | mugabe & nyakatawa | 2000  |
| wheat | 0.80 | zimbabwe  | afrika        | dryland     | throughout | 0.63 | fine   | mugabe & nyakatawa | 2000  |
| wheat | 0.93 | zimbabwe  | afrika        | dryland     | throughout | 0.82 | fine   | mugabe & nyakatawa | 2000  |
| wheat | 0.80 | zimbabwe  | afrika        | dryland     | throughout | 0.63 | fine   | mugabe & nyakatawa | 2000  |
| wheat | 0.71 | iran      | asia          | dryland     | throughout | 0.46 | n/a    | najafian et al     | 2011  |
| wheat | 0.48 | iran      | asia          | dryland     | throughout | 0.21 | n/a    | najafian et al     | 2011  |
| wheat | 0.83 | UK        | europa        | non-dryland | throughout | 0.64 | coarse | foulkes et al      | 2002  |
| wheat | 0.66 | UK        | europa        | non-dryland | throughout | 0.49 | coarse | foulkes et al      | 2002  |
| wheat | 0.56 | UK        | europa        | non-dryland | throughout | 0.50 | coarse | foulkes et al      | 2002  |
| wheat | 0.79 | iran      | asia          | dryland     | throughout | n/a  | n/a    | nouri et al        | 2011  |
| wheat | 0.98 | USA       | north america | dryland     | throughout | 0.74 | coarse | english & nakamura | 1989  |
| wheat | 0.96 | USA       | north america | dryland     | throughout | 0.63 | coarse | english & nakamura | 1989  |
| wheat | 0.69 | USA       | north america | dryland     | throughout | 0.39 | coarse | english & nakamura | 1989  |
| wheat | 0.50 | USA       | north america | dryland     | throughout | 0.27 | coarse | english & nakamura | 1989  |
| wheat | 0.99 | USA       | north america | dryland     | throughout | 0.85 | coarse | english & nakamura | 1989  |
| wheat | 0.93 | USA       | north america | dryland     | throughout | 0.73 | coarse | english & nakamura | 1989  |

|       |      |           |               |             |            |      |        |                         |      |
|-------|------|-----------|---------------|-------------|------------|------|--------|-------------------------|------|
| wheat | 0.63 | USA       | north america | dryland     | throughout | 0.43 | coarse | english & nakamura      | 1989 |
| wheat | 0.48 | USA       | north america | dryland     | throughout | 0.26 | coarse | english & nakamura      | 1989 |
| wheat | 0.95 | USA       | north america | dryland     | throughout | 0.77 | coarse | english & nakamura      | 1989 |
| wheat | 0.92 | USA       | north america | dryland     | throughout | 0.78 | coarse | english & nakamura      | 1989 |
| wheat | 0.79 | USA       | north america | dryland     | throughout | 0.82 | coarse | english & nakamura      | 1989 |
| wheat | 0.77 | USA       | north america | dryland     | throughout | 0.60 | coarse | english & nakamura      | 1989 |
| wheat | 0.95 | USA       | north america | dryland     | throughout | 0.65 | coarse | english & nakamura      | 1989 |
| wheat | 1.01 | pakistan  | asia          | dryland     | throughout | 0.75 | medium | kahlown et al           | 2007 |
| wheat | 0.85 | pakistan  | asia          | dryland     | throughout | 0.76 | medium | kahlown et al           | 2007 |
| maize | 0.97 | china     | asia          | dryland     | throughout | 0.88 | medium | du et al                | 2010 |
| maize | 0.84 | china     | asia          | dryland     | throughout | 0.75 | medium | du et al                | 2010 |
| maize | 0.41 | china     | asia          | dryland     | throughout | 0.63 | medium | du et al                | 2010 |
| maize | 0.32 | china     | asia          | dryland     | throughout | 0.50 | medium | du et al                | 2010 |
| maize | 0.80 | china     | asia          | dryland     | throughout | 0.86 | medium | du et al                | 2010 |
| maize | 1.61 | china     | asia          | dryland     | throughout | 0.60 | medium | du et al                | 2010 |
| maize | 1.39 | china     | asia          | dryland     | throughout | 0.51 | medium | du et al                | 2010 |
| maize | 1.41 | china     | asia          | dryland     | throughout | 0.40 | medium | du et al                | 2010 |
| maize | 1.28 | china     | asia          | dryland     | throughout | 0.34 | medium | du et al                | 2010 |
| wheat | 0.95 | china     | asia          | dryland     | vegetative | n/a  | medium | du et al                | 2010 |
| wheat | 0.93 | china     | asia          | dryland     | generative | n/a  | medium | du et al                | 2011 |
| wheat | 0.90 | china     | asia          | dryland     | generative | n/a  | medium | du et al                | 2012 |
| wheat | 0.82 | china     | asia          | dryland     | generative | n/a  | medium | du et al                | 2013 |
| wheat | 0.80 | iran      | asia          | dryland     | throughout | 0.63 | n/a    | zarea-fizabady & ghodzi | 2004 |
| wheat | 0.60 | iran      | asia          | dryland     | throughout | 0.50 | n/a    | zarea-fizabady & ghodzi | 2004 |
| wheat | 0.96 | pakistan  | asia          | dryland     | vegetative | n/a  | n/a    | qadir et al             | 1999 |
| wheat | 0.91 | pakistan  | asia          | dryland     | generative | n/a  | n/a    | qadir et al             | 1999 |
| wheat | 0.90 | pakistan  | asia          | dryland     | generative | n/a  | n/a    | hussain et al           | 2004 |
| wheat | 0.83 | pakistan  | asia          | dryland     | generative | n/a  | n/a    | hussain et al           | 2004 |
| wheat | 0.71 | pakistan  | asia          | dryland     | throughout | n/a  | n/a    | hussain et al           | 2004 |
| wheat | 0.98 | pakistan  | asia          | dryland     | vegetative | n/a  | n/a    | hussain et al           | 2004 |
| wheat | 0.93 | pakistan  | asia          | dryland     | generative | n/a  | n/a    | hussain et al           | 2004 |
| wheat | 0.93 | pakistan  | asia          | dryland     | generative | n/a  | n/a    | hussain et al           | 2004 |
| wheat | 0.90 | pakistan  | asia          | dryland     | throughout | n/a  | n/a    | hussain et al           | 2004 |
| wheat | 1.03 | pakistan  | asia          | dryland     | vegetative | n/a  | n/a    | hussain et al           | 1997 |
| wheat | 1.09 | pakistan  | asia          | dryland     | generative | n/a  | n/a    | hussain et al           | 1997 |
| wheat | 0.93 | pakistan  | asia          | dryland     | throughout | n/a  | n/a    | hussain et al           | 1997 |
| wheat | 1.00 | pakistan  | asia          | dryland     | generative | n/a  | n/a    | hussain et al           | 1997 |
| wheat | 0.95 | pakistan  | asia          | dryland     | throughout | n/a  | n/a    | hussain et al           | 1997 |
| wheat | 0.74 | iran      | asia          | dryland     | generative | n/a  | medium | johari-piretvalou       | 2010 |
| wheat | 1.12 | china     | asia          | dryland     | vegetative | 0.75 | coarse | li et al                | 2005 |
| wheat | 1.03 | china     | asia          | dryland     | vegetative | 0.75 | coarse | li et al                | 2005 |
| wheat | 0.94 | china     | asia          | dryland     | generative | 0.50 | coarse | li et al                | 2005 |
| wheat | 1.05 | china     | asia          | dryland     | generative | 0.50 | coarse | li et al                | 2005 |
| wheat | 0.95 | china     | asia          | dryland     | vegetative | 0.50 | coarse | li et al                | 2005 |
| wheat | 0.99 | china     | asia          | dryland     | generative | 0.50 | coarse | li et al                | 2005 |
| wheat | 0.96 | china     | asia          | dryland     | generative | 0.25 | coarse | li et al                | 2005 |
| wheat | 0.93 | china     | asia          | dryland     | generative | 0.25 | coarse | li et al                | 2005 |
| wheat | 0.92 | china     | asia          | dryland     | generative | 0.25 | coarse | li et al                | 2005 |
| wheat | 0.80 | china     | asia          | dryland     | throughout | 0.29 | coarse | li et al                | 2005 |
| wheat | 1.00 | china     | asia          | dryland     | generative | 0.67 | coarse | li et al                | 2005 |
| wheat | 0.88 | china     | asia          | dryland     | generative | 0.33 | coarse | li et al                | 2005 |
| wheat | 0.76 | china     | asia          | dryland     | throughout | 0.24 | coarse | li et al                | 2005 |
| wheat | 0.89 | china     | asia          | dryland     | generative | 0.50 | coarse | li et al                | 2005 |
| wheat | 0.92 | china     | asia          | dryland     | generative | 0.50 | coarse | li et al                | 2005 |
| wheat | 0.87 | china     | asia          | dryland     | generative | 0.50 | coarse | li et al                | 2005 |
| wheat | 0.74 | china     | asia          | dryland     | throughout | 0.47 | coarse | li et al                | 2005 |
| wheat | 0.97 | banglades | asia          | non-dryland | throughout | 0.92 | medium | ali et al               | 2007 |
| wheat | 0.88 | banglades | asia          | non-dryland | vegetative | 0.74 | medium | ali et al               | 2007 |
| wheat | 0.94 | banglades | asia          | non-dryland | vegetative | 0.73 | medium | ali et al               | 2007 |
| wheat | 0.92 | banglades | asia          | non-dryland | vegetative | 0.71 | medium | ali et al               | 2007 |
| wheat | 0.94 | banglades | asia          | non-dryland | generative | 0.68 | medium | ali et al               | 2007 |
| wheat | 0.84 | banglades | asia          | non-dryland | vegetative | 0.59 | medium | ali et al               | 2007 |
| wheat | 0.89 | banglades | asia          | non-dryland | generative | 0.49 | medium | ali et al               | 2007 |
| wheat | 0.80 | banglades | asia          | non-dryland | throughout | 0.40 | medium | ali et al               | 2007 |
| wheat | 0.49 | banglades | asia          | non-dryland | throughout | 0.07 | medium | ali et al               | 2007 |
| wheat | 0.84 | USA       | north america | dryland     | generative | 0.61 | coarse | guttieri et al          | 1999 |
| wheat | 0.52 | USA       | north america | dryland     | generative | 0.22 | coarse | guttieri et al          | 1999 |
| wheat | 0.16 | australia | australia     | dryland     | throughout | 0.09 | fine   | morgan & condon         | 1986 |
| maize | 0.89 | turkey    | asia          | dryland     | throughout | 0.50 | fine   | kirda et al             | 2005 |
| maize | 0.80 | china     | asia          | dryland     | vegetative | 0.98 | medium | kang et al              | 2000 |
| maize | 0.61 | china     | asia          | dryland     | vegetative | 0.75 | medium | kang et al              | 2000 |
| maize | 0.80 | china     | asia          | dryland     | vegetative | 0.81 | medium | kang et al              | 2000 |
| maize | 0.99 | china     | asia          | dryland     | vegetative | 0.77 | medium | kang et al              | 2000 |
| maize | 0.65 | china     | asia          | dryland     | vegetative | 0.79 | medium | kang et al              | 2000 |
| maize | 0.86 | china     | asia          | dryland     | vegetative | 0.96 | medium | kang et al              | 2000 |
| maize | 0.92 | china     | asia          | dryland     | vegetative | 0.76 | medium | kang et al              | 2000 |
| maize | 0.62 | china     | asia          | dryland     | vegetative | 0.70 | medium | kang et al              | 2000 |
| maize | 0.87 | china     | asia          | dryland     | vegetative | 0.95 | medium | kang et al              | 2000 |
| maize | 0.66 | china     | asia          | dryland     | vegetative | 0.72 | medium | kang et al              | 2000 |
| maize | 0.86 | china     | asia          | dryland     | vegetative | 0.79 | medium | kang et al              | 2000 |

|       |      |           |               |             |            |      |        |                 |      |
|-------|------|-----------|---------------|-------------|------------|------|--------|-----------------|------|
| maize | 0.99 | china     | asia          | dryland     | vegetative | 0.81 | medium | kang et al      | 2000 |
| maize | 0.69 | china     | asia          | dryland     | vegetative | 0.76 | medium | kang et al      | 2000 |
| maize | 0.85 | china     | asia          | dryland     | vegetative | 0.87 | medium | kang et al      | 2000 |
| maize | 0.92 | china     | asia          | dryland     | vegetative | 0.71 | medium | kang et al      | 2000 |
| maize | 0.68 | china     | asia          | dryland     | vegetative | 0.67 | medium | kang et al      | 2000 |
| wheat | 0.90 | china     | asia          | dryland     | throughout | 0.63 | coarse | pan et al       | 2003 |
| wheat | 0.65 | china     | asia          | dryland     | throughout | 0.49 | coarse | pan et al       | 2003 |
| wheat | 0.81 | china     | asia          | dryland     | throughout | 0.61 | coarse | pan et al       | 2003 |
| wheat | 0.53 | china     | asia          | dryland     | throughout | 0.48 | coarse | pan et al       | 2003 |
| wheat | 0.98 | india     | asia          | non-dryland | throughout | 0.99 | coarse | panda et al     | 2003 |
| wheat | 0.95 | india     | asia          | non-dryland | throughout | 0.90 | coarse | panda et al     | 2003 |
| wheat | 0.95 | india     | asia          | non-dryland | throughout | 0.85 | coarse | panda et al     | 2003 |
| wheat | 0.95 | india     | asia          | non-dryland | throughout | 0.87 | coarse | panda et al     | 2003 |
| wheat | 0.95 | india     | asia          | non-dryland | throughout | 0.97 | coarse | panda et al     | 2003 |
| wheat | 0.93 | india     | asia          | non-dryland | throughout | 0.92 | coarse | panda et al     | 2003 |
| wheat | 0.88 | india     | asia          | non-dryland | throughout | 0.88 | coarse | panda et al     | 2003 |
| wheat | 0.86 | india     | asia          | non-dryland | throughout | 0.79 | coarse | panda et al     | 2003 |
| wheat | 0.98 | india     | asia          | non-dryland | throughout | 0.89 | coarse | panda et al     | 2003 |
| wheat | 0.95 | india     | asia          | non-dryland | throughout | 0.83 | coarse | panda et al     | 2003 |
| wheat | 0.92 | india     | asia          | non-dryland | throughout | 0.82 | coarse | panda et al     | 2003 |
| wheat | 0.92 | india     | asia          | non-dryland | throughout | 0.72 | coarse | panda et al     | 2003 |
| wheat | 0.79 | australia | australia     | dryland     | throughout | 0.91 | fine   | steiner et al   | 1985 |
| wheat | 0.72 | australia | australia     | dryland     | throughout | 0.70 | fine   | steiner et al   | 1985 |
| wheat | 0.31 | australia | australia     | dryland     | throughout | 0.22 | fine   | steiner et al   | 1985 |
| wheat | 0.97 | iran      | asia          | dryland     | generative | 0.89 | medium | andarzian et al | 2011 |
| wheat | 0.95 | turkey    | asia          | dryland     | throughout | 0.77 | medium | ilbeyi et al    | 2006 |
| wheat | 0.92 | turkey    | asia          | dryland     | throughout | 0.53 | medium | ilbeyi et al    | 2006 |
| wheat | 0.57 | turkey    | asia          | dryland     | throughout | 0.30 | medium | ilbeyi et al    | 2006 |
| wheat | 0.98 | turkey    | asia          | dryland     | throughout | 0.78 | medium | ilbeyi et al    | 2006 |
| wheat | 0.89 | turkey    | asia          | dryland     | throughout | 0.56 | medium | ilbeyi et al    | 2006 |
| wheat | 0.68 | turkey    | asia          | dryland     | throughout | 0.33 | medium | ilbeyi et al    | 2006 |
| wheat | 1.02 | turkey    | asia          | dryland     | throughout | 0.84 | medium | ilbeyi et al    | 2006 |
| wheat | 1.01 | turkey    | asia          | dryland     | throughout | 0.68 | medium | ilbeyi et al    | 2006 |
| wheat | 0.74 | turkey    | asia          | dryland     | throughout | 0.52 | medium | ilbeyi et al    | 2006 |
| wheat | 0.97 | turkey    | asia          | dryland     | throughout | 0.85 | medium | ilbeyi et al    | 2006 |
| wheat | 1.00 | turkey    | asia          | dryland     | throughout | 0.70 | medium | ilbeyi et al    | 2006 |
| wheat | 0.72 | turkey    | asia          | dryland     | throughout | 0.55 | medium | ilbeyi et al    | 2006 |
| wheat | 0.97 | turkey    | asia          | dryland     | throughout | 0.78 | medium | ilbeyi et al    | 2006 |
| wheat | 0.94 | turkey    | asia          | dryland     | throughout | 0.55 | medium | ilbeyi et al    | 2006 |
| wheat | 0.58 | turkey    | asia          | dryland     | throughout | 0.33 | medium | ilbeyi et al    | 2006 |
| wheat | 0.95 | turkey    | asia          | dryland     | throughout | 0.79 | medium | ilbeyi et al    | 2006 |
| wheat | 0.98 | turkey    | asia          | dryland     | throughout | 0.58 | medium | ilbeyi et al    | 2006 |
| wheat | 0.81 | turkey    | asia          | dryland     | throughout | 0.37 | medium | ilbeyi et al    | 2006 |
| wheat | 0.97 | turkey    | asia          | dryland     | throughout | 0.82 | medium | ilbeyi et al    | 2006 |
| wheat | 0.90 | turkey    | asia          | dryland     | throughout | 0.64 | medium | ilbeyi et al    | 2006 |
| wheat | 0.71 | turkey    | asia          | dryland     | throughout | 0.46 | medium | ilbeyi et al    | 2006 |
| wheat | 0.96 | turkey    | asia          | dryland     | throughout | 0.83 | medium | ilbeyi et al    | 2006 |
| wheat | 0.95 | turkey    | asia          | dryland     | throughout | 0.66 | medium | ilbeyi et al    | 2006 |
| wheat | 0.86 | turkey    | asia          | dryland     | throughout | 0.49 | medium | ilbeyi et al    | 2006 |
| wheat | 0.93 | USA       | north america | dryland     | throughout | 0.87 | coarse | miller & hang   | 1982 |
| wheat | 0.84 | USA       | north america | dryland     | throughout | 0.73 | coarse | miller & hang   | 1982 |
| wheat | 0.70 | USA       | north america | dryland     | throughout | 0.60 | coarse | miller & hang   | 1982 |
| wheat | 0.52 | USA       | north america | dryland     | throughout | 0.47 | coarse | miller & hang   | 1982 |
| wheat | 0.36 | USA       | north america | dryland     | throughout | 0.33 | coarse | miller & hang   | 1982 |
| wheat | 0.16 | USA       | north america | dryland     | throughout | 0.20 | coarse | miller & hang   | 1982 |
| wheat | 0.92 | USA       | north america | dryland     | throughout | 0.85 | coarse | miller & hang   | 1982 |
| wheat | 0.69 | USA       | north america | dryland     | throughout | 0.69 | coarse | miller & hang   | 1982 |
| wheat | 0.79 | USA       | north america | dryland     | throughout | 0.54 | coarse | miller & hang   | 1982 |
| wheat | 0.73 | USA       | north america | dryland     | throughout | 0.38 | coarse | miller & hang   | 1982 |
| wheat | 0.59 | USA       | north america | dryland     | throughout | 0.23 | coarse | miller & hang   | 1982 |
| wheat | 1.04 | USA       | north america | dryland     | throughout | 0.90 | medium | miller & hang   | 1982 |
| wheat | 1.06 | USA       | north america | dryland     | throughout | 0.81 | medium | miller & hang   | 1982 |
| wheat | 1.24 | USA       | north america | dryland     | throughout | 0.71 | medium | miller & hang   | 1982 |
| wheat | 1.06 | USA       | north america | dryland     | throughout | 0.62 | medium | miller & hang   | 1982 |
| wheat | 1.22 | USA       | north america | dryland     | throughout | 0.52 | medium | miller & hang   | 1982 |
| wheat | 1.10 | USA       | north america | dryland     | throughout | 0.43 | medium | miller & hang   | 1982 |
| wheat | 0.96 | USA       | north america | dryland     | throughout | 0.33 | medium | miller & hang   | 1982 |
| wheat | 0.84 | USA       | north america | dryland     | throughout | 0.24 | medium | miller & hang   | 1982 |
| wheat | 0.52 | USA       | north america | dryland     | throughout | 0.14 | medium | miller & hang   | 1982 |
| wheat | 0.96 | USA       | north america | dryland     | throughout | 0.87 | medium | miller & hang   | 1982 |
| wheat | 0.95 | USA       | north america | dryland     | throughout | 0.73 | medium | miller & hang   | 1982 |
| wheat | 0.95 | USA       | north america | dryland     | throughout | 0.60 | medium | miller & hang   | 1982 |
| wheat | 0.95 | USA       | north america | dryland     | throughout | 0.47 | medium | miller & hang   | 1982 |
| wheat | 0.96 | USA       | north america | dryland     | throughout | 0.33 | medium | miller & hang   | 1982 |
| wheat | 0.82 | USA       | north america | dryland     | throughout | 0.20 | medium | miller & hang   | 1982 |
| maize | 0.81 | tanzania  | africa        | non-dryland | vegetative | 0.84 | medium | igbadun et al   | 2006 |
| maize | 0.73 | tanzania  | africa        | non-dryland | generative | 0.86 | medium | igbadun et al   | 2006 |
| maize | 0.74 | tanzania  | africa        | non-dryland | generative | 0.87 | medium | igbadun et al   | 2006 |
| maize | 0.60 | tanzania  | africa        | non-dryland | generative | 0.70 | medium | igbadun et al   | 2006 |
| maize | 0.72 | tanzania  | africa        | non-dryland | generative | 0.71 | medium | igbadun et al   | 2006 |

|       |      |           |           |             |            |      |        |                   |      |
|-------|------|-----------|-----------|-------------|------------|------|--------|-------------------|------|
| maize | 0.60 | tanzania  | africa    | non-dryland | generative | 0.73 | medium | igbadun et al     | 2006 |
| maize | 0.43 | tanzania  | africa    | non-dryland | generative | 0.57 | medium | igbadun et al     | 2006 |
| maize | 0.95 | tanzania  | africa    | non-dryland | vegetative | 0.84 | medium | igbadun et al     | 2006 |
| maize | 0.71 | tanzania  | africa    | non-dryland | generative | 0.86 | medium | igbadun et al     | 2006 |
| maize | 0.80 | tanzania  | africa    | non-dryland | generative | 0.87 | medium | igbadun et al     | 2006 |
| maize | 0.69 | tanzania  | africa    | non-dryland | generative | 0.70 | medium | igbadun et al     | 2006 |
| maize | 0.81 | tanzania  | africa    | non-dryland | generative | 0.71 | medium | igbadun et al     | 2006 |
| maize | 0.73 | tanzania  | africa    | non-dryland | generative | 0.73 | medium | igbadun et al     | 2006 |
| maize | 0.53 | tanzania  | africa    | non-dryland | generative | 0.57 | medium | igbadun et al     | 2006 |
| maize | 0.84 | tanzania  | africa    | non-dryland | vegetative | 0.84 | medium | igbadun et al     | 2006 |
| maize | 0.78 | tanzania  | africa    | non-dryland | generative | 0.86 | medium | igbadun et al     | 2006 |
| maize | 0.75 | tanzania  | africa    | non-dryland | generative | 0.87 | medium | igbadun et al     | 2006 |
| maize | 0.44 | tanzania  | africa    | non-dryland | generative | 0.57 | medium | igbadun et al     | 2006 |
| wheat | 0.44 | australia | australia | dryland     | generative | n/a  | medium | thomson & chase   | 1992 |
| wheat | 0.80 | australia | australia | dryland     | generative | n/a  | medium | thomson & chase   | 1992 |
| wheat | 0.47 | australia | australia | dryland     | vegetative | n/a  | medium | thomson & chase   | 1992 |
| wheat | 0.36 | australia | australia | dryland     | generative | n/a  | medium | thomson & chase   | 1992 |
| wheat | 0.14 | australia | australia | dryland     | throughout | n/a  | medium | thomson & chase   | 1992 |
| wheat | 0.90 | india     | asia      | dryland     | generative | 0.84 | coarse | sharma et al      | 1990 |
| wheat | 0.93 | india     | asia      | dryland     | generative | 0.84 | coarse | sharma et al      | 1990 |
| wheat | 0.71 | india     | asia      | dryland     | generative | 0.68 | coarse | sharma et al      | 1990 |
| wheat | 0.84 | india     | asia      | dryland     | generative | 0.68 | coarse | sharma et al      | 1990 |
| wheat | 0.73 | india     | asia      | dryland     | vegetative | 0.68 | coarse | sharma et al      | 1990 |
| wheat | 0.58 | india     | asia      | dryland     | generative | 0.52 | coarse | sharma et al      | 1990 |
| wheat | 0.40 | india     | asia      | dryland     | throughout | 0.36 | coarse | sharma et al      | 1990 |
| wheat | 0.15 | india     | asia      | dryland     | throughout | 0.20 | coarse | sharma et al      | 1990 |
| wheat | 0.83 | india     | asia      | dryland     | generative | 0.84 | coarse | sharma et al      | 1990 |
| wheat | 0.96 | india     | asia      | dryland     | generative | 0.84 | coarse | sharma et al      | 1990 |
| wheat | 0.79 | india     | asia      | dryland     | generative | 0.69 | coarse | sharma et al      | 1990 |
| wheat | 0.90 | india     | asia      | dryland     | generative | 0.69 | coarse | sharma et al      | 1990 |
| wheat | 0.69 | india     | asia      | dryland     | vegetative | 0.69 | coarse | sharma et al      | 1990 |
| wheat | 0.57 | india     | asia      | dryland     | generative | 0.53 | coarse | sharma et al      | 1990 |
| wheat | 0.34 | india     | asia      | dryland     | throughout | 0.48 | coarse | sharma et al      | 1990 |
| wheat | 0.21 | india     | asia      | dryland     | throughout | 0.22 | coarse | sharma et al      | 1990 |
| wheat | 1.01 | china     | asia      | dryland     | throughout | 0.83 | medium | liu et al         | 2011 |
| wheat | 1.01 | china     | asia      | dryland     | throughout | 0.67 | medium | liu et al         | 2011 |
| wheat | 1.07 | china     | asia      | dryland     | throughout | 0.80 | medium | liu et al         | 2011 |
| wheat | 0.93 | china     | asia      | dryland     | throughout | 0.63 | medium | liu et al         | 2011 |
| wheat | 0.78 | china     | asia      | dryland     | throughout | 0.46 | medium | liu et al         | 2011 |
| wheat | 1.04 | china     | asia      | dryland     | throughout | 0.95 | medium | liu et al         | 2011 |
| wheat | 0.95 | china     | asia      | dryland     | throughout | 0.91 | medium | liu et al         | 2011 |
| wheat | 0.98 | china     | asia      | dryland     | throughout | 0.86 | medium | liu et al         | 2011 |
| wheat | 0.46 | india     | asia      | non-dryland | throughout | 0.34 | coarse | innes & blackwell | 1981 |
| wheat | 0.56 | india     | asia      | non-dryland | generative | 0.53 | coarse | innes & blackwell | 1981 |
| wheat | 0.57 | india     | asia      | non-dryland | vegetative | 0.79 | coarse | innes & blackwell | 1981 |
| wheat | 0.52 | india     | asia      | non-dryland | vegetative | 0.87 | coarse | innes & blackwell | 1981 |
| wheat | 0.27 | india     | asia      | non-dryland | generative | 0.39 | coarse | innes & blackwell | 1981 |
| wheat | 1.02 | india     | asia      | non-dryland | generative | 0.88 | medium | mishra et al      | 1999 |
| wheat | 1.02 | india     | asia      | non-dryland | generative | 0.76 | medium | mishra et al      | 1999 |
| wheat | 1.01 | india     | asia      | non-dryland | vegetative | 0.64 | medium | mishra et al      | 1999 |
| wheat | 1.00 | india     | asia      | non-dryland | throughout | 0.52 | medium | mishra et al      | 1999 |
| wheat | 0.68 | india     | asia      | non-dryland | throughout | 0.40 | medium | mishra et al      | 1999 |
| wheat | 1.02 | india     | asia      | non-dryland | generative | 0.83 | medium | mishra et al      | 1999 |
| wheat | 1.03 | india     | asia      | non-dryland | generative | 0.66 | medium | mishra et al      | 1999 |
| wheat | 1.02 | india     | asia      | non-dryland | vegetative | 0.49 | medium | mishra et al      | 1999 |
| wheat | 0.64 | india     | asia      | non-dryland | throughout | 0.32 | medium | mishra et al      | 1999 |
| wheat | 0.57 | india     | asia      | non-dryland | throughout | 0.15 | medium | mishra et al      | 1999 |
| wheat | 1.03 | india     | asia      | non-dryland | generative | 0.88 | medium | mishra et al      | 1999 |
| wheat | 1.03 | india     | asia      | non-dryland | generative | 0.76 | medium | mishra et al      | 1999 |
| wheat | 0.98 | india     | asia      | non-dryland | vegetative | 0.64 | medium | mishra et al      | 1999 |
| wheat | 0.96 | india     | asia      | non-dryland | throughout | 0.52 | medium | mishra et al      | 1999 |
| wheat | 0.67 | india     | asia      | non-dryland | throughout | 0.40 | medium | mishra et al      | 1999 |
| wheat | 1.03 | india     | asia      | non-dryland | generative | 0.83 | medium | mishra et al      | 1999 |
| wheat | 1.01 | india     | asia      | non-dryland | generative | 0.66 | medium | mishra et al      | 1999 |
| wheat | 0.99 | india     | asia      | non-dryland | vegetative | 0.49 | medium | mishra et al      | 1999 |
| wheat | 0.60 | india     | asia      | non-dryland | throughout | 0.32 | medium | mishra et al      | 1999 |
| wheat | 0.54 | india     | asia      | non-dryland | throughout | 0.15 | medium | mishra et al      | 1999 |
| wheat | 0.94 | england   | europa    | non-dryland | generative | 0.11 | medium | gales & wilson    | 1981 |
| wheat | 0.97 | england   | europa    | non-dryland | generative | 0.15 | medium | gales & wilson    | 1981 |
| wheat | 1.02 | england   | europa    | non-dryland | generative | 0.09 | medium | gales & wilson    | 1981 |
| wheat | 0.92 | england   | europa    | non-dryland | generative | 0.11 | medium | gales & wilson    | 1981 |
| wheat | 0.95 | england   | europa    | non-dryland | generative | 0.13 | medium | gales & wilson    | 1981 |
| wheat | 0.91 | england   | europa    | non-dryland | generative | 0.09 | medium | gales & wilson    | 1981 |
| wheat | 0.98 | england   | europa    | non-dryland | generative | 0.12 | medium | gales & wilson    | 1981 |
| wheat | 1.02 | england   | europa    | non-dryland | generative | 0.16 | medium | gales & wilson    | 1981 |
| wheat | 0.96 | england   | europa    | non-dryland | generative | 0.14 | medium | gales & wilson    | 1981 |
| wheat | 0.99 | england   | europa    | non-dryland | generative | 0.09 | medium | gales & wilson    | 1981 |
| wheat | 1.07 | england   | europa    | non-dryland | generative | 0.06 | medium | gales & wilson    | 1981 |
| wheat | 0.97 | england   | europa    | non-dryland | generative | 0.07 | medium | gales & wilson    | 1981 |
| wheat | 0.99 | banglades | asia      | non-dryland | vegetative | 0.79 | medium | rahman et al      | 1981 |

|       |      |           |               |             |            |      |        |                    |      |
|-------|------|-----------|---------------|-------------|------------|------|--------|--------------------|------|
| wheat | 0.81 | banglades | asia          | non-dryland | generative | 0.62 | medium | rahman et al       | 1981 |
| wheat | 1.09 | banglades | asia          | non-dryland | generative | 0.75 | medium | rahman et al       | 1981 |
| wheat | 0.52 | banglades | asia          | non-dryland | vegetative | 0.46 | medium | rahman et al       | 1981 |
| wheat | 0.80 | banglades | asia          | non-dryland | generative | 0.37 | medium | rahman et al       | 1981 |
| wheat | 0.69 | banglades | asia          | non-dryland | generative | 0.25 | medium | rahman et al       | 1981 |
| wheat | 0.57 | banglades | asia          | non-dryland | throughout | 0.01 | medium | rahman et al       | 1981 |
| wheat | 0.58 | USA       | north america | dryland     | vegetative | 0.87 | coarse | ehdaie             | 1995 |
| wheat | 0.42 | denmark   | europa        | non-dryland | vegetative | 0.35 | coarse | mogensen et al     | 1985 |
| wheat | 0.50 | denmark   | europa        | non-dryland | vegetative | 0.20 | coarse | mogensen et al     | 1985 |
| wheat | 0.51 | denmark   | europa        | non-dryland | vegetative | 0.20 | coarse | mogensen et al     | 1985 |
| wheat | 0.63 | denmark   | europa        | non-dryland | generative | 0.11 | coarse | mogensen et al     | 1985 |
| wheat | 0.81 | denmark   | europa        | non-dryland | generative | 0.07 | coarse | mogensen et al     | 1985 |
| wheat | 0.88 | denmark   | europa        | non-dryland | generative | 0.05 | coarse | mogensen et al     | 1985 |
| wheat | 0.85 | denmark   | europa        | non-dryland | generative | 0.16 | coarse | mogensen et al     | 1985 |
| wheat | 0.83 | denmark   | europa        | non-dryland | vegetative | 0.35 | coarse | mogensen et al     | 1985 |
| wheat | 0.84 | denmark   | europa        | non-dryland | vegetative | 0.20 | coarse | mogensen et al     | 1985 |
| wheat | 0.69 | denmark   | europa        | non-dryland | vegetative | 0.20 | coarse | mogensen et al     | 1985 |
| wheat | 0.63 | denmark   | europa        | non-dryland | generative | 0.11 | coarse | mogensen et al     | 1985 |
| wheat | 0.81 | denmark   | europa        | non-dryland | generative | 0.07 | coarse | mogensen et al     | 1985 |
| wheat | 0.88 | denmark   | europa        | non-dryland | generative | 0.05 | coarse | mogensen et al     | 1985 |
| wheat | 0.85 | denmark   | europa        | non-dryland | generative | 0.16 | coarse | mogensen et al     | 1985 |
| wheat | 0.76 | germany   | europa        | non-dryland | vegetative | n/a  | coarse | singh et al        | 1987 |
| wheat | 0.81 | germany   | europa        | non-dryland | generative | n/a  | coarse | singh et al        | 1987 |
| wheat | 0.99 | germany   | europa        | non-dryland | generative | n/a  | coarse | singh et al        | 1987 |
| wheat | 0.81 | germany   | europa        | non-dryland | vegetative | n/a  | coarse | singh et al        | 1987 |
| wheat | 0.65 | germany   | europa        | non-dryland | generative | n/a  | coarse | singh et al        | 1987 |
| wheat | 1.12 | germany   | europa        | non-dryland | generative | n/a  | coarse | singh et al        | 1987 |
| wheat | 0.37 | germany   | europa        | non-dryland | throughout | n/a  | coarse | singh et al        | 1987 |
| wheat | 0.87 | india     | asia          | dryland     | throughout | n/a  | n/a    | singh et al        | 1987 |
| wheat | 0.82 | india     | asia          | dryland     | vegetative | n/a  | n/a    | singh et al        | 1987 |
| wheat | 0.83 | india     | asia          | dryland     | vegetative | n/a  | n/a    | singh et al        | 1987 |
| wheat | 0.99 | india     | asia          | non-dryland | throughout | n/a  | n/a    | chaturvedi et al   | 1981 |
| wheat | 0.53 | india     | asia          | non-dryland | throughout | n/a  | n/a    | chaturvedi et al   | 1981 |
| maize | 0.94 | USA       | north america | dryland     | throughout | 0.91 | medium | retta & hanks      | 1980 |
| maize | 0.84 | USA       | north america | dryland     | throughout | 0.72 | medium | retta & hanks      | 1980 |
| maize | 0.74 | USA       | north america | dryland     | throughout | 0.59 | medium | retta & hanks      | 1980 |
| maize | 0.53 | USA       | north america | dryland     | throughout | 0.39 | medium | retta & hanks      | 1980 |
| maize | 0.37 | USA       | north america | dryland     | throughout | 0.30 | medium | retta & hanks      | 1980 |
| maize | 0.88 | USA       | north america | dryland     | generative | 0.87 | medium | retta & hanks      | 1980 |
| maize | 0.93 | USA       | north america | dryland     | generative | 0.79 | medium | retta & hanks      | 1980 |
| maize | 0.75 | USA       | north america | dryland     | generative | 0.60 | medium | retta & hanks      | 1980 |
| maize | 0.47 | USA       | north america | dryland     | generative | 0.46 | medium | retta & hanks      | 1980 |
| maize | 0.32 | USA       | north america | dryland     | generative | 0.41 | medium | retta & hanks      | 1980 |
| maize | 0.82 | USA       | north america | dryland     | vegetative | 0.94 | medium | retta & hanks      | 1980 |
| maize | 0.96 | USA       | north america | dryland     | vegetative | 0.86 | medium | retta & hanks      | 1980 |
| maize | 0.97 | USA       | north america | dryland     | vegetative | 0.75 | medium | retta & hanks      | 1980 |
| maize | 0.92 | USA       | north america | dryland     | vegetative | 0.64 | medium | retta & hanks      | 1980 |
| maize | 0.74 | USA       | north america | dryland     | vegetative | 0.62 | medium | retta & hanks      | 1980 |
| wheat | 0.76 | iran      | asia          | dryland     | generative | 0.82 | medium | pireivatlou et al  | 2010 |
| wheat | 1.11 | iran      | asia          | dryland     | throughout | 0.97 | n/a    | salemi et al       | 2011 |
| wheat | 0.89 | iran      | asia          | dryland     | throughout | 0.89 | n/a    | salemi et al       | 2011 |
| wheat | 0.92 | iran      | asia          | dryland     | throughout | 0.77 | n/a    | salemi et al       | 2011 |
| wheat | 0.97 | iran      | asia          | dryland     | throughout | 0.76 | n/a    | salemi et al       | 2011 |
| wheat | 0.80 | iran      | asia          | dryland     | throughout | 0.68 | n/a    | salemi et al       | 2011 |
| wheat | 0.93 | iran      | asia          | dryland     | throughout | 0.67 | n/a    | salemi et al       | 2011 |
| wheat | 0.83 | iran      | asia          | dryland     | throughout | 0.64 | n/a    | salemi et al       | 2011 |
| wheat | 0.69 | iran      | asia          | dryland     | throughout | 0.61 | n/a    | salemi et al       | 2011 |
| wheat | 0.79 | USA       | north america | dryland     | generative | 0.64 | medium | johnson & kanemasu | 1982 |
| wheat | 0.72 | USA       | north america | dryland     | vegetative | 0.61 | medium | johnson & kanemasu | 1982 |
| wheat | 1.07 | USA       | north america | dryland     | generative | 0.38 | medium | johnson & kanemasu | 1982 |
| wheat | 0.74 | USA       | north america | dryland     | vegetative | 0.38 | medium | johnson & kanemasu | 1982 |
| wheat | 0.63 | USA       | north america | dryland     | throughout | 0.33 | medium | johnson & kanemasu | 1982 |
| wheat | 1.03 | china     | asia          | dryland     | generative | 0.92 | coarse | liao et al         | 2008 |
| wheat | 1.00 | china     | asia          | dryland     | generative | 0.85 | coarse | liao et al         | 2008 |
| wheat | 0.96 | china     | asia          | dryland     | generative | 0.77 | coarse | liao et al         | 2008 |
| wheat | 0.86 | china     | asia          | dryland     | generative | 0.69 | coarse | liao et al         | 2008 |
| wheat | 0.81 | china     | asia          | dryland     | generative | 0.62 | coarse | liao et al         | 2008 |
| wheat | 0.74 | china     | asia          | dryland     | generative | 0.54 | coarse | liao et al         | 2008 |
| wheat | 0.64 | china     | asia          | dryland     | throughout | 0.46 | coarse | liao et al         | 2008 |
| wheat | 0.54 | china     | asia          | dryland     | throughout | 0.38 | coarse | liao et al         | 2008 |
| wheat | 0.43 | china     | asia          | dryland     | throughout | 0.31 | coarse | liao et al         | 2008 |
| wheat | 1.03 | china     | asia          | dryland     | generative | 0.92 | coarse | liao et al         | 2008 |
| wheat | 0.99 | china     | asia          | dryland     | generative | 0.85 | coarse | liao et al         | 2008 |
| wheat | 0.96 | china     | asia          | dryland     | generative | 0.77 | coarse | liao et al         | 2008 |
| wheat | 0.85 | china     | asia          | dryland     | generative | 0.69 | coarse | liao et al         | 2008 |
| wheat | 0.79 | china     | asia          | dryland     | generative | 0.62 | coarse | liao et al         | 2008 |
| wheat | 0.74 | china     | asia          | dryland     | generative | 0.54 | coarse | liao et al         | 2008 |
| wheat | 0.29 | india     | asia          | dryland     | throughout | 0.22 | n/a    | singh et al        | 2012 |
| maize | 0.94 | thailand  | asia          | non-dryland | throughout | 0.33 | medium | weerathaworn et al | 1992 |
| maize | 0.77 | thailand  | asia          | non-dryland | generative | 0.67 | medium | weerathaworn et al | 1992 |

|       |      |          |               |             |            |      |        |                    |      |
|-------|------|----------|---------------|-------------|------------|------|--------|--------------------|------|
| maize | 0.92 | thailand | asia          | non-dryland | vegetative | 0.67 | medium | weerathaworn et al | 1992 |
| maize | 0.78 | thailand | asia          | non-dryland | throughout | 0.17 | medium | weerathaworn et al | 1992 |
| maize | 0.88 | thailand | asia          | non-dryland | generative | 0.58 | medium | weerathaworn et al | 1992 |
| maize | 0.86 | thailand | asia          | non-dryland | vegetative | 0.58 | medium | weerathaworn et al | 1992 |
| wheat | 0.61 | turkey   | asia          | dryland     | throughout | 0.81 | medium | ozturk & aydin     | 2004 |
| wheat | 0.60 | turkey   | asia          | dryland     | vegetative | 0.81 | medium | ozturk & aydin     | 2004 |
| wheat | 0.78 | turkey   | asia          | dryland     | generative | 0.88 | medium | ozturk & aydin     | 2004 |
| wheat | 0.33 | turkey   | asia          | dryland     | throughout | 0.65 | medium | ozturk & aydin     | 2004 |
| wheat | 0.77 | turkey   | asia          | dryland     | throughout | 0.87 | medium | ozturk & aydin     | 2004 |
| wheat | 0.59 | turkey   | asia          | dryland     | vegetative | 0.84 | medium | ozturk & aydin     | 2004 |
| wheat | 0.74 | turkey   | asia          | dryland     | generative | 0.91 | medium | ozturk & aydin     | 2004 |
| wheat | 0.36 | turkey   | asia          | dryland     | throughout | 0.71 | medium | ozturk & aydin     | 2004 |
| wheat | 0.93 | china    | asia          | dryland     | generative | 0.86 | medium | huang et al        | 2004 |
| wheat | 0.86 | china    | asia          | dryland     | generative | 0.72 | medium | huang et al        | 2004 |
| wheat | 0.78 | china    | asia          | dryland     | generative | 0.58 | medium | huang et al        | 2004 |
| wheat | 0.65 | china    | asia          | dryland     | throughout | 0.44 | medium | huang et al        | 2004 |
| maize | 0.80 | china    | asia          | dryland     | throughout | 0.74 | medium | liu et al          | 2010 |
| maize | 0.73 | china    | asia          | dryland     | throughout | 0.82 | medium | liu et al          | 2010 |
| maize | 0.88 | USA      | north america | dryland     | vegetative | 0.89 | medium | payero et al       | 2006 |
| maize | 0.91 | USA      | north america | dryland     | generative | 0.83 | medium | payero et al       | 2006 |
| maize | 0.82 | USA      | north america | dryland     | generative | 0.93 | medium | payero et al       | 2006 |
| maize | 0.84 | USA      | north america | dryland     | generative | 0.77 | medium | payero et al       | 2006 |
| maize | 0.78 | USA      | north america | dryland     | throughout | 0.63 | medium | payero et al       | 2006 |
| maize | 0.72 | USA      | north america | dryland     | throughout | 0.72 | medium | payero et al       | 2006 |
| maize | 0.24 | USA      | north america | dryland     | throughout | 0.26 | medium | payero et al       | 2006 |
| maize | 0.99 | USA      | north america | dryland     | vegetative | 0.83 | medium | payero et al       | 2006 |
| maize | 0.87 | USA      | north america | dryland     | throughout | 0.79 | medium | payero et al       | 2006 |
| maize | 0.93 | USA      | north america | dryland     | vegetative | 0.87 | medium | payero et al       | 2006 |
| maize | 1.00 | USA      | north america | dryland     | throughout | 0.83 | medium | payero et al       | 2006 |
| maize | 0.87 | USA      | north america | dryland     | throughout | 0.80 | medium | payero et al       | 2006 |
| maize | 0.90 | USA      | north america | dryland     | throughout | 0.78 | medium | payero et al       | 2006 |
| maize | 0.81 | USA      | north america | dryland     | throughout | 0.78 | medium | payero et al       | 2006 |
| maize | 0.56 | USA      | north america | dryland     | throughout | 0.72 | medium | payero et al       | 2006 |
| wheat | 0.95 | mexico   | south america | dryland     | vegetative | 0.80 | coarse | moinuddin et al    | 2005 |
| wheat | 0.77 | mexico   | south america | dryland     | vegetative | 0.60 | coarse | moinuddin et al    | 2005 |
| wheat | 0.53 | mexico   | south america | dryland     | vegetative | 0.42 | coarse | moinuddin et al    | 2005 |
| wheat | 0.34 | mexico   | south america | dryland     | vegetative | 0.28 | coarse | moinuddin et al    | 2005 |
| wheat | 1.13 | mexico   | south america | dryland     | vegetative | 0.86 | coarse | moinuddin et al    | 2005 |
| wheat | 1.05 | mexico   | south america | dryland     | vegetative | 0.86 | coarse | moinuddin et al    | 2005 |
| wheat | 0.71 | mexico   | south america | dryland     | vegetative | 0.80 | coarse | moinuddin et al    | 2005 |
| wheat | 0.63 | mexico   | south america | dryland     | generative | 0.59 | coarse | moinuddin et al    | 2005 |
| wheat | 0.34 | mexico   | south america | dryland     | generative | 0.45 | coarse | moinuddin et al    | 2005 |
| wheat | 0.96 | mexico   | south america | dryland     | throughout | 0.91 | coarse | moinuddin et al    | 2005 |
| wheat | 0.82 | mexico   | south america | dryland     | throughout | 0.66 | coarse | moinuddin et al    | 2005 |
| wheat | 0.69 | mexico   | south america | dryland     | throughout | 0.49 | coarse | moinuddin et al    | 2005 |
| wheat | 0.57 | mexico   | south america | dryland     | throughout | 0.41 | coarse | moinuddin et al    | 2005 |
| wheat | 0.95 | mexico   | south america | dryland     | throughout | 0.91 | coarse | moinuddin et al    | 2005 |
| wheat | 0.81 | mexico   | south america | dryland     | throughout | 0.66 | coarse | moinuddin et al    | 2005 |
| wheat | 0.67 | mexico   | south america | dryland     | throughout | 0.49 | coarse | moinuddin et al    | 2005 |
| wheat | 0.53 | mexico   | south america | dryland     | throughout | 0.41 | coarse | moinuddin et al    | 2005 |
| wheat | 1.10 | china    | asia          | non-dryland | generative | 0.85 | medium | zhang et al        | 2008 |
| wheat | 1.05 | china    | asia          | non-dryland | generative | 0.70 | medium | zhang et al        | 2008 |
| wheat | 1.04 | china    | asia          | non-dryland | generative | 0.54 | medium | zhang et al        | 2008 |
| wheat | 0.84 | china    | asia          | non-dryland | throughout | 0.39 | medium | zhang et al        | 2008 |
| wheat | 0.79 | china    | asia          | non-dryland | throughout | 0.22 | medium | zhang et al        | 2008 |
| wheat | 1.02 | china    | asia          | non-dryland | generative | 0.86 | medium | zhang et al        | 2008 |
| wheat | 1.18 | china    | asia          | non-dryland | generative | 0.73 | medium | zhang et al        | 2008 |
| wheat | 1.20 | china    | asia          | non-dryland | generative | 0.73 | medium | zhang et al        | 2008 |
| wheat | 1.13 | china    | asia          | non-dryland | throughout | 0.45 | medium | zhang et al        | 2008 |
| wheat | 0.79 | china    | asia          | non-dryland | throughout | 0.29 | medium | zhang et al        | 2008 |
| wheat | 1.02 | china    | asia          | non-dryland | generative | 0.88 | medium | zhang et al        | 2008 |
| wheat | 1.02 | china    | asia          | non-dryland | generative | 0.75 | medium | zhang et al        | 2008 |
| wheat | 1.00 | china    | asia          | non-dryland | generative | 0.63 | medium | zhang et al        | 2008 |
| wheat | 1.03 | china    | asia          | non-dryland | throughout | 0.50 | medium | zhang et al        | 2008 |
| wheat | 1.08 | china    | asia          | non-dryland | throughout | 0.36 | medium | zhang et al        | 2008 |
| wheat | 1.35 | china    | asia          | non-dryland | generative | 0.89 | medium | zhang et al        | 2008 |
| wheat | 1.33 | china    | asia          | non-dryland | generative | 0.77 | medium | zhang et al        | 2008 |
| wheat | 1.38 | china    | asia          | non-dryland | generative | 0.66 | medium | zhang et al        | 2008 |
| wheat | 1.39 | china    | asia          | non-dryland | throughout | 0.54 | medium | zhang et al        | 2008 |
| wheat | 1.29 | china    | asia          | non-dryland | throughout | 0.41 | medium | zhang et al        | 2008 |
| wheat | 1.39 | china    | asia          | non-dryland | generative | 0.86 | medium | zhang et al        | 2008 |
| wheat | 1.38 | china    | asia          | non-dryland | generative | 0.72 | medium | zhang et al        | 2008 |
| wheat | 1.44 | china    | asia          | non-dryland | generative | 0.58 | medium | zhang et al        | 2008 |
| wheat | 1.39 | china    | asia          | non-dryland | throughout | 0.44 | medium | zhang et al        | 2008 |
| wheat | 1.21 | china    | asia          | non-dryland | throughout | 0.27 | medium | zhang et al        | 2008 |
| wheat | 1.11 | china    | asia          | non-dryland | generative | 0.85 | medium | zhang et al        | 2008 |
| wheat | 1.13 | china    | asia          | non-dryland | generative | 0.69 | medium | zhang et al        | 2008 |
| wheat | 1.05 | china    | asia          | non-dryland | generative | 0.54 | medium | zhang et al        | 2008 |
| wheat | 0.87 | china    | asia          | non-dryland | throughout | 0.39 | medium | zhang et al        | 2008 |
| wheat | 0.27 | china    | asia          | non-dryland | throughout | 0.21 | medium | zhang et al        | 2008 |



|       |      |          |               |             |            |      |        |               |      |
|-------|------|----------|---------------|-------------|------------|------|--------|---------------|------|
| maize | 0.78 | USA      | north america | non-dryland | vegetative | 0.93 | coarse | heng et al    | 2009 |
| maize | 0.26 | USA      | north america | non-dryland | throughout | 0.72 | coarse | heng et al    | 2009 |
| maize | 1.00 | spain    | europa        | dryland     | throughout | 0.57 | medium | heng et al    | 2009 |
| maize | 0.82 | spain    | europa        | dryland     | throughout | 0.31 | medium | heng et al    | 2009 |
| wheat | 0.97 | china    | asia          | dryland     | vegetative | n/a  | medium | zhang et al   | 2005 |
| wheat | 1.00 | china    | asia          | dryland     | generative | n/a  | medium | zhang et al   | 2005 |
| wheat | 0.99 | china    | asia          | dryland     | generative | n/a  | medium | zhang et al   | 2005 |
| wheat | 1.00 | china    | asia          | dryland     | generative | n/a  | medium | zhang et al   | 2005 |
| wheat | 0.99 | china    | asia          | dryland     | generative | n/a  | medium | zhang et al   | 2005 |
| wheat | 0.96 | china    | asia          | dryland     | throughout | n/a  | medium | zhang et al   | 2005 |
| wheat | 1.02 | china    | asia          | dryland     | vegetative | n/a  | medium | zhang et al   | 2005 |
| wheat | 1.00 | china    | asia          | dryland     | generative | n/a  | medium | zhang et al   | 2005 |
| wheat | 1.02 | china    | asia          | dryland     | generative | n/a  | medium | zhang et al   | 2005 |
| wheat | 1.03 | china    | asia          | dryland     | generative | n/a  | medium | zhang et al   | 2005 |
| wheat | 1.00 | china    | asia          | dryland     | generative | n/a  | medium | zhang et al   | 2005 |
| wheat | 1.02 | china    | asia          | dryland     | throughout | n/a  | medium | zhang et al   | 2005 |
| wheat | 1.05 | china    | asia          | dryland     | vegetative | n/a  | medium | zhang et al   | 2005 |
| wheat | 1.03 | china    | asia          | dryland     | generative | n/a  | medium | zhang et al   | 2005 |
| wheat | 1.05 | china    | asia          | dryland     | generative | n/a  | medium | zhang et al   | 2005 |
| wheat | 1.03 | china    | asia          | dryland     | generative | n/a  | medium | zhang et al   | 2005 |
| wheat | 1.03 | china    | asia          | dryland     | generative | n/a  | medium | zhang et al   | 2005 |
| wheat | 0.95 | china    | asia          | dryland     | throughout | n/a  | medium | zhang et al   | 2005 |
| wheat | 1.03 | china    | asia          | dryland     | vegetative | n/a  | medium | zhang et al   | 2005 |
| wheat | 0.99 | china    | asia          | dryland     | generative | n/a  | medium | zhang et al   | 2005 |
| wheat | 1.00 | china    | asia          | dryland     | generative | n/a  | medium | zhang et al   | 2005 |
| wheat | 0.79 | china    | asia          | dryland     | generative | n/a  | medium | zhang et al   | 2005 |
| wheat | 0.85 | china    | asia          | dryland     | generative | n/a  | medium | zhang et al   | 2005 |
| wheat | 0.75 | china    | asia          | dryland     | throughout | n/a  | medium | zhang et al   | 2005 |
| wheat | 1.00 | china    | asia          | dryland     | vegetative | n/a  | medium | zhang et al   | 2005 |
| wheat | 0.91 | china    | asia          | dryland     | generative | n/a  | medium | zhang et al   | 2005 |
| wheat | 0.93 | china    | asia          | dryland     | generative | n/a  | medium | zhang et al   | 2005 |
| wheat | 0.91 | china    | asia          | dryland     | generative | n/a  | medium | zhang et al   | 2005 |
| wheat | 0.88 | china    | asia          | dryland     | generative | n/a  | medium | zhang et al   | 2005 |
| wheat | 0.76 | china    | asia          | dryland     | throughout | n/a  | medium | zhang et al   | 2005 |
| wheat | 1.01 | china    | asia          | dryland     | generative | 0.73 | medium | hu et al      | 2005 |
| wheat | 0.83 | china    | asia          | dryland     | generative | 0.47 | medium | hu et al      | 2005 |
| wheat | 0.77 | china    | asia          | dryland     | throughout | 0.20 | medium | hu et al      | 2005 |
| wheat | 0.93 | china    | asia          | dryland     | generative | 0.73 | medium | hu et al      | 2005 |
| wheat | 0.80 | china    | asia          | dryland     | generative | 0.46 | medium | hu et al      | 2005 |
| wheat | 0.66 | china    | asia          | dryland     | throughout | 0.18 | medium | hu et al      | 2005 |
| wheat | 0.94 | china    | asia          | dryland     | generative | 0.75 | medium | hu et al      | 2005 |
| wheat | 0.77 | china    | asia          | dryland     | generative | 0.51 | medium | hu et al      | 2005 |
| wheat | 0.72 | china    | asia          | dryland     | throughout | 0.26 | medium | hu et al      | 2005 |
| wheat | 1.18 | china    | asia          | dryland     | generative | 0.77 | medium | hu et al      | 2005 |
| wheat | 1.10 | china    | asia          | dryland     | generative | 0.53 | medium | hu et al      | 2005 |
| wheat | 0.77 | china    | asia          | dryland     | throughout | 0.30 | medium | hu et al      | 2005 |
| maize | 0.85 | tanzania | africa        | non-dryland | vegetative | 0.84 | coarse | igbadun et al | 2008 |
| maize | 0.74 | tanzania | africa        | non-dryland | generative | 0.86 | coarse | igbadun et al | 2008 |
| maize | 0.78 | tanzania | africa        | non-dryland | generative | 0.87 | coarse | igbadun et al | 2008 |
| maize | 0.62 | tanzania | africa        | non-dryland | generative | 0.70 | coarse | igbadun et al | 2008 |
| maize | 0.72 | tanzania | africa        | non-dryland | generative | 0.71 | coarse | igbadun et al | 2008 |
| maize | 0.61 | tanzania | africa        | non-dryland | generative | 0.73 | coarse | igbadun et al | 2008 |
| maize | 0.45 | tanzania | africa        | non-dryland | throughout | 0.57 | coarse | igbadun et al | 2008 |
| maize | 0.88 | tanzania | africa        | non-dryland | vegetative | 0.83 | coarse | igbadun et al | 2008 |
| maize | 0.75 | tanzania | africa        | non-dryland | generative | 0.87 | coarse | igbadun et al | 2008 |
| maize | 0.77 | tanzania | africa        | non-dryland | generative | 0.89 | coarse | igbadun et al | 2008 |
| maize | 0.57 | tanzania | africa        | non-dryland | generative | 0.69 | coarse | igbadun et al | 2008 |
| maize | 0.65 | tanzania | africa        | non-dryland | generative | 0.72 | coarse | igbadun et al | 2008 |
| maize | 0.56 | tanzania | africa        | non-dryland | generative | 0.76 | coarse | igbadun et al | 2008 |
| maize | 0.37 | tanzania | africa        | non-dryland | throughout | 0.59 | coarse | igbadun et al | 2008 |
| wheat | 0.61 | USA      | north america | dryland     | generative | n/a  | n/a    | butler et al  | 2005 |
| maize | 1.05 | india    | asia          | dryland     | vegetative | 0.85 | medium | mishra et al  | 2001 |
| maize | 1.07 | india    | asia          | dryland     | generative | 0.70 | medium | mishra et al  | 2001 |
| maize | 1.03 | india    | asia          | dryland     | generative | 0.80 | medium | mishra et al  | 2001 |
| maize | 0.88 | india    | asia          | dryland     | generative | 0.40 | medium | mishra et al  | 2001 |
| maize | 0.64 | india    | asia          | dryland     | throughout | 0.10 | medium | mishra et al  | 2001 |
| maize | 1.00 | india    | asia          | dryland     | vegetative | 0.85 | medium | mishra et al  | 2001 |
| maize | 1.03 | india    | asia          | dryland     | generative | 0.71 | medium | mishra et al  | 2001 |
| maize | 0.99 | india    | asia          | dryland     | generative | 0.56 | medium | mishra et al  | 2001 |
| maize | 0.85 | india    | asia          | dryland     | generative | 0.42 | medium | mishra et al  | 2001 |
| maize | 0.58 | india    | asia          | dryland     | throughout | 0.13 | medium | mishra et al  | 2001 |
| wheat | 0.88 | china    | asia          | dryland     | vegetative | 0.94 | medium | zhang et al   | 1999 |
| wheat | 0.86 | china    | asia          | dryland     | vegetative | 0.90 | medium | zhang et al   | 1999 |
| wheat | 1.07 | china    | asia          | dryland     | generative | 0.88 | medium | zhang et al   | 1999 |
| wheat | 1.06 | china    | asia          | dryland     | generative | 0.72 | medium | zhang et al   | 1999 |
| wheat | 1.00 | china    | asia          | dryland     | generative | 0.60 | medium | zhang et al   | 1999 |
| wheat | 0.73 | china    | asia          | dryland     | throughout | 0.40 | medium | zhang et al   | 1999 |
| wheat | 0.52 | china    | asia          | dryland     | throughout | 0.25 | medium | zhang et al   | 1999 |
| wheat | 1.11 | china    | asia          | dryland     | vegetative | 0.97 | medium | zhang et al   | 1999 |
| wheat | 1.10 | china    | asia          | dryland     | vegetative | 0.82 | medium | zhang et al   | 1999 |

|       |      |        |               |             |            |      |        |                    |      |
|-------|------|--------|---------------|-------------|------------|------|--------|--------------------|------|
| wheat | 1.15 | china  | asia          | dryland     | generative | 0.72 | medium | zhang et al        | 1999 |
| wheat | 1.12 | china  | asia          | dryland     | generative | 0.60 | medium | zhang et al        | 1999 |
| wheat | 1.05 | china  | asia          | dryland     | generative | 0.45 | medium | zhang et al        | 1999 |
| wheat | 0.84 | china  | asia          | dryland     | throughout | 0.28 | medium | zhang et al        | 1999 |
| wheat | 0.59 | china  | asia          | dryland     | throughout | 0.20 | medium | zhang et al        | 1999 |
| wheat | 1.06 | china  | asia          | dryland     | vegetative | 0.90 | coarse | zhang et al        | 1999 |
| wheat | 1.10 | china  | asia          | dryland     | generative | 0.79 | coarse | zhang et al        | 1999 |
| wheat | 1.10 | china  | asia          | dryland     | generative | 0.68 | coarse | zhang et al        | 1999 |
| wheat | 1.00 | china  | asia          | dryland     | throughout | 0.49 | coarse | zhang et al        | 1999 |
| wheat | 0.67 | china  | asia          | dryland     | throughout | 0.32 | coarse | zhang et al        | 1999 |
| wheat | 0.92 | china  | asia          | dryland     | vegetative | 0.90 | medium | zhang et al        | 1999 |
| wheat | 0.96 | china  | asia          | dryland     | generative | 0.79 | medium | zhang et al        | 1999 |
| wheat | 0.79 | china  | asia          | dryland     | generative | 0.65 | medium | zhang et al        | 1999 |
| wheat | 0.58 | china  | asia          | dryland     | throughout | 0.49 | medium | zhang et al        | 1999 |
| wheat | 0.54 | china  | asia          | dryland     | throughout | 0.31 | medium | zhang et al        | 1999 |
| wheat | 1.05 | china  | asia          | dryland     | generative | 0.66 | coarse | sun et al          | 2006 |
| wheat | 1.03 | china  | asia          | dryland     | vegetative | 0.82 | coarse | sun et al          | 2006 |
| wheat | 1.03 | china  | asia          | dryland     | vegetative | 0.74 | coarse | sun et al          | 2006 |
| wheat | 0.67 | china  | asia          | dryland     | throughout | 0.29 | coarse | sun et al          | 2006 |
| wheat | 1.04 | china  | asia          | dryland     | generative | 0.82 | coarse | sun et al          | 2006 |
| wheat | 1.00 | china  | asia          | dryland     | vegetative | 0.85 | coarse | sun et al          | 2006 |
| wheat | 0.98 | china  | asia          | dryland     | vegetative | 0.92 | coarse | sun et al          | 2006 |
| wheat | 0.67 | china  | asia          | dryland     | throughout | 0.49 | coarse | sun et al          | 2006 |
| wheat | 1.02 | china  | asia          | dryland     | generative | 0.78 | coarse | sun et al          | 2006 |
| wheat | 1.02 | china  | asia          | dryland     | vegetative | 0.77 | coarse | sun et al          | 2006 |
| wheat | 0.99 | china  | asia          | dryland     | vegetative | 0.77 | coarse | sun et al          | 2006 |
| wheat | 0.81 | china  | asia          | dryland     | throughout | 0.41 | coarse | sun et al          | 2006 |
| wheat | 0.97 | china  | asia          | dryland     | generative | 0.68 | n/a    | han et al          | 2008 |
| maize | 0.93 | USA    | north america | non-dryland | throughout | 0.48 | coarse | steele et al       | 1994 |
| maize | 0.97 | USA    | north america | non-dryland | throughout | 0.65 | coarse | steele et al       | 1994 |
| maize | 0.96 | USA    | north america | non-dryland | throughout | 0.50 | coarse | steele et al       | 1994 |
| maize | 0.98 | USA    | north america | non-dryland | throughout | 0.49 | coarse | steele et al       | 1994 |
| maize | 0.96 | USA    | north america | non-dryland | throughout | 0.44 | coarse | steele et al       | 1994 |
| maize | 0.96 | USA    | north america | non-dryland | throughout | 0.60 | coarse | steele et al       | 1994 |
| maize | 0.98 | USA    | north america | non-dryland | throughout | 0.61 | coarse | steele et al       | 1994 |
| maize | 0.88 | USA    | north america | non-dryland | throughout | 0.56 | coarse | steele et al       | 1994 |
| maize | 1.02 | USA    | north america | non-dryland | throughout | 0.69 | coarse | steele et al       | 1994 |
| maize | 0.94 | USA    | north america | non-dryland | throughout | 0.57 | coarse | steele et al       | 1994 |
| maize | 1.02 | USA    | north america | non-dryland | throughout | 0.74 | coarse | steele et al       | 1994 |
| maize | 0.89 | USA    | north america | non-dryland | throughout | 0.54 | coarse | steele et al       | 1994 |
| maize | 0.97 | USA    | north america | non-dryland | throughout | 0.86 | coarse | steele et al       | 1994 |
| maize | 0.97 | USA    | north america | non-dryland | throughout | 0.77 | coarse | steele et al       | 1994 |
| maize | 1.07 | USA    | north america | non-dryland | throughout | 0.57 | coarse | steele et al       | 1994 |
| maize | 1.08 | USA    | north america | non-dryland | throughout | 0.85 | coarse | steele et al       | 1994 |
| maize | 0.96 | USA    | north america | non-dryland | throughout | 0.67 | coarse | steele et al       | 1994 |
| maize | 1.13 | USA    | north america | non-dryland | throughout | 0.61 | coarse | steele et al       | 1994 |
| maize | 0.85 | USA    | north america | non-dryland | throughout | 0.38 | coarse | steele et al       | 1994 |
| maize | 1.11 | USA    | north america | non-dryland | throughout | 0.70 | coarse | steele et al       | 1994 |
| maize | 1.03 | USA    | north america | non-dryland | throughout | 0.65 | coarse | steele et al       | 1994 |
| maize | 0.99 | USA    | north america | dryland     | throughout | 0.93 | medium | yazar et al        | 1999 |
| maize | 0.84 | USA    | north america | dryland     | throughout | 0.86 | medium | yazar et al        | 1999 |
| maize | 0.78 | USA    | north america | dryland     | throughout | 0.79 | medium | yazar et al        | 1999 |
| maize | 0.66 | USA    | north america | dryland     | throughout | 0.72 | medium | yazar et al        | 1999 |
| maize | 0.48 | USA    | north america | dryland     | throughout | 0.65 | medium | yazar et al        | 1999 |
| wheat | 0.90 | mexico | south america | dryland     | generative | 0.72 | n/a    | saint pierre et al | 2012 |
| wheat | 0.87 | mexico | south america | dryland     | generative | 0.60 | n/a    | saint pierre et al | 2012 |
| wheat | 0.63 | mexico | south america | dryland     | throughout | 0.45 | n/a    | saint pierre et al | 2012 |
| wheat | 1.06 | china  | asia          | dryland     | vegetative | n/a  | medium | li et al           | 2009 |
| wheat | 1.04 | china  | asia          | dryland     | vegetative | n/a  | medium | li et al           | 2009 |
| wheat | 0.96 | china  | asia          | dryland     | generative | n/a  | medium | li et al           | 2009 |
| wheat | 0.86 | china  | asia          | dryland     | vegetative | n/a  | medium | li et al           | 2009 |
| wheat | 0.87 | china  | asia          | dryland     | generative | n/a  | medium | li et al           | 2009 |
| wheat | 0.89 | china  | asia          | dryland     | throughout | n/a  | medium | li et al           | 2009 |
| maize | 0.86 | turkey | asia          | dryland     | throughout | 0.61 | fine   | yazar et al        | 2009 |
| maize | 0.98 | turkey | asia          | dryland     | throughout | 0.84 | fine   | yazar et al        | 2009 |
| maize | 0.85 | turkey | asia          | dryland     | throughout | 0.68 | fine   | yazar et al        | 2009 |
| maize | 0.83 | USA    | north america | dryland     | vegetative | 0.60 | medium | musick & dusek     | 1980 |
| maize | 0.77 | USA    | north america | dryland     | vegetative | 0.40 | medium | musick & dusek     | 1980 |
| maize | 0.87 | USA    | north america | dryland     | vegetative | 0.60 | medium | musick & dusek     | 1980 |
| maize | 0.66 | USA    | north america | dryland     | generative | 0.40 | medium | musick & dusek     | 1980 |
| maize | 0.83 | USA    | north america | dryland     | generative | 0.60 | medium | musick & dusek     | 1980 |
| maize | 0.52 | USA    | north america | dryland     | generative | 0.40 | medium | musick & dusek     | 1980 |
| maize | 0.67 | USA    | north america | dryland     | generative | 0.60 | medium | musick & dusek     | 1980 |
| maize | 0.88 | USA    | north america | dryland     | generative | 0.80 | medium | musick & dusek     | 1980 |
| maize | 0.56 | USA    | north america | dryland     | generative | 0.60 | medium | musick & dusek     | 1980 |
| maize | 0.73 | USA    | north america | dryland     | vegetative | 0.60 | medium | musick & dusek     | 1980 |
| maize | 0.57 | USA    | north america | dryland     | vegetative | 0.40 | medium | musick & dusek     | 1980 |
| maize | 0.73 | USA    | north america | dryland     | vegetative | 0.60 | medium | musick & dusek     | 1980 |
| maize | 0.46 | USA    | north america | dryland     | generative | 0.60 | medium | musick & dusek     | 1980 |
| maize | 0.10 | USA    | north america | dryland     | generative | 0.40 | medium | musick & dusek     | 1980 |

|       |      |        |               |             |            |      |        |                  |       |
|-------|------|--------|---------------|-------------|------------|------|--------|------------------|-------|
| maize | 0.61 | USA    | north america | dryland     | generative | 0.80 | medium | musick & dusek   | 1980  |
| maize | 0.33 | USA    | north america | dryland     | generative | 0.60 | medium | musick & dusek   | 1980  |
| maize | 0.06 | USA    | north america | dryland     | generative | 0.40 | medium | musick & dusek   | 1980  |
| maize | 0.68 | USA    | north america | dryland     | generative | 0.80 | medium | musick & dusek   | 1980  |
| maize | 0.32 | USA    | north america | dryland     | generative | 0.60 | medium | musick & dusek   | 1980  |
| maize | 0.70 | USA    | north america | dryland     | generative | 0.80 | medium | musick & dusek   | 1980  |
| maize | 1.07 | USA    | north america | dryland     | generative | 0.83 | medium | musick & dusek   | 1980  |
| maize | 1.01 | USA    | north america | dryland     | vegetative | 0.83 | medium | musick & dusek   | 1980  |
| maize | 0.00 | USA    | north america | dryland     | throughout | 0.17 | medium | musick & dusek   | 1980  |
| maize | 0.43 | USA    | north america | dryland     | vegetative | 0.33 | medium | musick & dusek   | 1980  |
| maize | 0.38 | USA    | north america | dryland     | vegetative | 0.33 | medium | musick & dusek   | 1980  |
| maize | 0.33 | USA    | north america | dryland     | generative | 0.33 | medium | musick & dusek   | 1980  |
| maize | 0.29 | USA    | north america | dryland     | throughout | 0.50 | medium | musick & dusek   | 1980  |
| maize | 0.27 | USA    | north america | dryland     | throughout | 0.50 | medium | musick & dusek   | 1980  |
| maize | 0.08 | USA    | north america | dryland     | generative | 0.50 | medium | musick & dusek   | 1980  |
| maize | 0.33 | USA    | north america | dryland     | vegetative | 0.50 | medium | musick & dusek   | 1980  |
| maize | 0.58 | USA    | north america | dryland     | throughout | 0.67 | medium | musick & dusek   | 1980  |
| maize | 0.77 | USA    | north america | dryland     | generative | 0.67 | medium | musick & dusek   | 1980  |
| maize | 0.79 | USA    | north america | dryland     | vegetative | 0.67 | medium | musick & dusek   | 1980  |
| wheat | 1.00 | syria  | asia          | dryland     | throughout | 0.75 | fine   | zhang & oweis    | 1999  |
| wheat | 0.66 | syria  | asia          | dryland     | throughout | 0.50 | fine   | zhang & oweis    | 1999  |
| wheat | 0.13 | syria  | asia          | dryland     | throughout | 0.28 | fine   | zhang & oweis    | 1999  |
| wheat | 1.12 | china  | asia          | dryland     | throughout | 0.91 | medium | zhang et al      | 2005  |
| wheat | 1.38 | china  | asia          | dryland     | generative | 0.83 | medium | zhang et al      | 2005  |
| wheat | 1.36 | china  | asia          | dryland     | generative | 0.74 | medium | zhang et al      | 2005  |
| wheat | 1.42 | china  | asia          | dryland     | vegetative | 0.84 | medium | zhang et al      | 2005  |
| wheat | 1.36 | china  | asia          | dryland     | vegetative | 0.80 | medium | zhang et al      | 2005  |
| wheat | 0.96 | china  | asia          | dryland     | throughout | 0.92 | medium | zhang et al      | 2005  |
| wheat | 1.14 | china  | asia          | dryland     | generative | 0.85 | medium | zhang et al      | 2005  |
| wheat | 1.04 | china  | asia          | dryland     | generative | 0.77 | medium | zhang et al      | 2005  |
| wheat | 1.17 | china  | asia          | dryland     | vegetative | 0.85 | medium | zhang et al      | 2005  |
| wheat | 1.00 | china  | asia          | dryland     | vegetative | 0.81 | medium | zhang et al      | 2005  |
| wheat | 0.55 | canada | north america | dryland     | throughout | n/a  | n/a    | duggan et al     | 2000  |
| maize | 0.64 | egypt  | africa        | dryland     | throughout | 0.95 | fine   | el-tantawy et al | 2007  |
| maize | 0.64 | egypt  | africa        | dryland     | throughout | 0.93 | fine   | el-tantawy et al | 2007  |
| maize | 0.89 | turkey | asia          | dryland     | throughout | 0.75 | coarse | mengu & ozgurel  | 2008  |
| maize | 0.61 | turkey | asia          | dryland     | throughout | 0.59 | coarse | mengu & ozgurel  | 2008  |
| maize | 0.55 | turkey | asia          | dryland     | throughout | 0.43 | coarse | mengu & ozgurel  | 2008  |
| maize | 0.35 | turkey | asia          | dryland     | throughout | 0.18 | coarse | mengu & ozgurel  | 2008  |
| maize | 0.73 | turkey | asia          | dryland     | throughout | 0.78 | coarse | mengu & ozgurel  | 2008  |
| maize | 0.53 | turkey | asia          | dryland     | throughout | 0.64 | coarse | mengu & ozgurel  | 2008  |
| maize | 0.40 | turkey | asia          | dryland     | throughout | 0.50 | coarse | mengu & ozgurel  | 2008  |
| maize | 0.21 | turkey | asia          | dryland     | throughout | 0.28 | coarse | mengu & ozgurel  | 2008  |
| maize | 0.96 | USA    | north america | non-dryland | vegetative | 0.88 | coarse | stegman          | 1982  |
| maize | 0.95 | USA    | north america | non-dryland | vegetative | 0.85 | coarse | stegman          | 1982  |
| maize | 0.94 | USA    | north america | non-dryland | generative | 0.81 | coarse | stegman          | 1982  |
| maize | 0.92 | USA    | north america | non-dryland | vegetative | 0.72 | coarse | stegman          | 1982  |
| maize | 0.74 | USA    | north america | non-dryland | generative | 0.66 | coarse | stegman          | 1982  |
| maize | 0.60 | USA    | north america | non-dryland | generative | 0.62 | coarse | stegman          | 1982  |
| maize | 0.18 | USA    | north america | non-dryland | throughout | 0.21 | coarse | stegman          | 1982  |
| maize | 0.96 | USA    | north america | non-dryland | throughout | 0.76 | coarse | stegman          | 1982  |
| maize | 0.89 | USA    | north america | non-dryland | generative | 0.61 | coarse | stegman          | 1982  |
| maize | 0.82 | USA    | north america | non-dryland | generative | 0.69 | coarse | stegman          | 1982  |
| maize | 0.80 | USA    | north america | non-dryland | generative | 0.54 | coarse | stegman          | 1982  |
| maize | 0.69 | USA    | north america | non-dryland | generative | 0.48 | coarse | stegman          | 1982  |
| maize | 0.58 | USA    | north america | non-dryland | generative | 0.49 | coarse | stegman          | 1982  |
| maize | 0.29 | USA    | north america | non-dryland | throughout | 0.05 | coarse | stegman          | 1982  |
| maize | 0.97 | USA    | north america | non-dryland | vegetative | 0.92 | medium | stegman          | 1982  |
| maize | 0.92 | USA    | north america | non-dryland | generative | 0.74 | medium | stegman          | 1982  |
| maize | 0.87 | USA    | north america | non-dryland | generative | 0.78 | medium | stegman          | 1982  |
| maize | 0.73 | USA    | north america | non-dryland | generative | 0.63 | medium | stegman          | 1982  |
| maize | 0.68 | USA    | north america | non-dryland | generative | 0.60 | medium | stegman          | 1982  |
| maize | 0.66 | USA    | north america | non-dryland | generative | 0.51 | medium | stegman          | 1982  |
| maize | 0.30 | USA    | north america | non-dryland | throughout | 0.00 | medium | stegman          | 1982  |
| maize | 0.96 | USA    | north america | non-dryland | throughout | 0.84 | coarse | stegman          | 1982  |
| maize | 0.92 | USA    | north america | non-dryland | generative | 0.77 | coarse | stegman          | 1982  |
| maize | 0.90 | USA    | north america | non-dryland | vegetative | 0.74 | coarse | stegman          | 1982  |
| maize | 0.87 | USA    | north america | non-dryland | generative | 0.71 | coarse | stegman          | 1982  |
| maize | 0.85 | USA    | north america | non-dryland | generative | 0.56 | coarse | stegman          | 1982  |
| maize | 0.78 | USA    | north america | non-dryland | generative | 0.60 | coarse | stegman          | 1982  |
| maize | 0.66 | USA    | north america | non-dryland | throughout | 0.23 | coarse | stegman          | 1982  |
| maize | 0.99 | USA    | north america | non-dryland | throughout | 0.81 | medium | stegman          | 1982  |
| maize | 0.97 | USA    | north america | non-dryland | vegetative | 0.81 | medium | stegman          | 1982  |
| maize | 0.93 | USA    | north america | non-dryland | generative | 0.70 | medium | stegman          | 1982  |
| maize | 0.93 | USA    | north america | non-dryland | generative | 0.66 | medium | stegman          | 1982  |
| maize | 0.92 | USA    | north america | non-dryland | generative | 0.68 | medium | stegman          | 1982  |
| maize | 0.89 | USA    | north america | non-dryland | generative | 0.44 | medium | stegman          | 1982  |
| maize | 0.68 | USA    | north america | non-dryland | throughout | 0.00 | medium | stegman          | 1982  |
| maize | 0.82 | brazil | north america | non-dryland | throughout | 0.60 | fine   | soler et al      | 2007  |
| maize | 1.04 | USA    | north america | dryland     | generative | 0.65 | medium | payero et al     | 2006b |

|       |      |        |               |             |            |      |        |                |       |
|-------|------|--------|---------------|-------------|------------|------|--------|----------------|-------|
| maize | 1.00 | USA    | north america | dryland     | generative | 0.67 | medium | payero et al   | 2006b |
| maize | 1.01 | USA    | north america | dryland     | throughout | 0.42 | medium | payero et al   | 2006b |
| maize | 1.00 | USA    | north america | dryland     | generative | 0.85 | medium | payero et al   | 2006b |
| maize | 0.97 | USA    | north america | dryland     | generative | 0.74 | medium | payero et al   | 2006b |
| maize | 0.96 | USA    | north america | dryland     | throughout | 0.55 | medium | payero et al   | 2006b |
| maize | 0.94 | USA    | north america | dryland     | generative | 0.56 | medium | payero et al   | 2006b |
| maize | 0.89 | USA    | north america | dryland     | generative | 0.55 | medium | payero et al   | 2006b |
| maize | 0.70 | USA    | north america | dryland     | throughout | 0.40 | medium | payero et al   | 2006b |
| maize | 0.35 | USA    | north america | dryland     | generative | 0.43 | medium | payero et al   | 2006b |
| maize | 0.70 | USA    | north america | dryland     | generative | 0.45 | medium | payero et al   | 2006b |
| maize | 0.20 | USA    | north america | dryland     | throughout | 0.33 | medium | payero et al   | 2006b |
| maize | 1.00 | USA    | north america | dryland     | generative | 0.87 | medium | payero et al   | 2006b |
| maize | 1.00 | USA    | north america | dryland     | generative | 0.89 | medium | payero et al   | 2006b |
| maize | 0.96 | USA    | north america | dryland     | throughout | 0.75 | medium | payero et al   | 2006b |
| maize | 0.29 | iran   | asia          | dryland     | throughout | 0.63 | n/a    | golbashy et al | 2010  |
| maize | 0.93 | china  | asia          | non-dryland | throughout | 0.75 | medium | ti et al       | 2010  |
| maize | 0.31 | china  | asia          | non-dryland | throughout | 0.50 | medium | ti et al       | 2010  |
| maize | 0.95 | china  | asia          | non-dryland | throughout | 0.75 | medium | ti et al       | 2010  |
| maize | 0.19 | china  | asia          | non-dryland | throughout | 0.50 | medium | ti et al       | 2010  |
| maize | 0.91 | turkey | asia          | dryland     | throughout | 0.82 | fine   | simsek et al   | 2011b |
| maize | 0.57 | turkey | asia          | dryland     | throughout | 0.63 | fine   | simsek et al   | 2011b |
| maize | 0.34 | turkey | asia          | dryland     | throughout | 0.45 | fine   | simsek et al   | 2011b |
| maize | 0.41 | spain  | europa        | dryland     | generative | 0.77 | coarse | farre et al    | 2000  |
| maize | 0.64 | spain  | europa        | dryland     | generative | 0.76 | coarse | farre et al    | 2000  |
| maize | 0.90 | spain  | europa        | dryland     | vegetative | 0.75 | coarse | farre et al    | 2000  |
| maize | 0.82 | spain  | europa        | dryland     | generative | 0.55 | coarse | farre et al    | 2000  |
| maize | 0.64 | spain  | europa        | dryland     | generative | 0.51 | coarse | farre et al    | 2000  |
| maize | 0.94 | spain  | europa        | dryland     | generative | 0.55 | coarse | farre et al    | 2000  |
| maize | 0.25 | spain  | europa        | dryland     | throughout | 0.31 | coarse | farre et al    | 2000  |
| maize | 0.71 | spain  | europa        | dryland     | throughout | 0.14 | coarse | farre et al    | 2000  |
| maize | 0.90 | spain  | europa        | dryland     | generative | 0.77 | coarse | farre et al    | 2000  |
| maize | 0.66 | spain  | europa        | dryland     | generative | 0.79 | coarse | farre et al    | 2000  |
| maize | 0.90 | spain  | europa        | dryland     | generative | 0.74 | coarse | farre et al    | 2000  |
| maize | 0.51 | spain  | europa        | dryland     | generative | 0.56 | coarse | farre et al    | 2000  |
| maize | 0.81 | spain  | europa        | dryland     | vegetative | 0.53 | coarse | farre et al    | 2000  |
| maize | 0.93 | spain  | europa        | dryland     | generative | 0.50 | coarse | farre et al    | 2000  |
| maize | 0.48 | spain  | europa        | dryland     | throughout | 0.30 | coarse | farre et al    | 2000  |
| maize | 0.76 | spain  | europa        | dryland     | throughout | 0.51 | coarse | farre et al    | 2000  |
| maize | 0.74 | spain  | europa        | dryland     | throughout | 0.82 | coarse | farre et al    | 2000  |
| maize | 0.41 | spain  | europa        | dryland     | throughout | 0.64 | coarse | farre et al    | 2000  |
| maize | 0.22 | spain  | europa        | dryland     | throughout | 0.27 | coarse | farre et al    | 2000  |
| maize | 0.07 | spain  | europa        | dryland     | throughout | 0.27 | coarse | farre et al    | 2000  |
| maize | 0.01 | spain  | europa        | dryland     | throughout | 0.18 | coarse | farre et al    | 2000  |
| maize | 0.41 | spain  | europa        | dryland     | generative | 0.79 | medium | farre & faci   | 2009  |
| maize | 0.62 | spain  | europa        | dryland     | generative | 0.77 | medium | farre & faci   | 2009  |
| maize | 0.88 | spain  | europa        | dryland     | vegetative | 0.77 | medium | farre & faci   | 2009  |
| maize | 0.81 | spain  | europa        | dryland     | generative | 0.58 | medium | farre & faci   | 2009  |
| maize | 0.59 | spain  | europa        | dryland     | generative | 0.54 | medium | farre & faci   | 2009  |
| maize | 0.94 | spain  | europa        | dryland     | generative | 0.58 | medium | farre & faci   | 2009  |
| maize | 0.96 | spain  | europa        | dryland     | throughout | 0.35 | medium | farre & faci   | 2009  |
| maize | 0.71 | spain  | europa        | dryland     | throughout | 0.59 | medium | farre & faci   | 2009  |
| maize | 0.87 | spain  | europa        | dryland     | generative | 0.81 | medium | farre & faci   | 2009  |
| maize | 0.60 | spain  | europa        | dryland     | generative | 0.83 | medium | farre & faci   | 2009  |
| maize | 0.87 | spain  | europa        | dryland     | vegetative | 0.78 | medium | farre & faci   | 2009  |
| maize | 0.47 | spain  | europa        | dryland     | generative | 0.63 | medium | farre & faci   | 2009  |
| maize | 0.79 | spain  | europa        | dryland     | generative | 0.61 | medium | farre & faci   | 2009  |
| maize | 0.90 | spain  | europa        | dryland     | generative | 0.59 | medium | farre & faci   | 2009  |
| maize | 0.46 | spain  | europa        | dryland     | throughout | 0.42 | medium | farre & faci   | 2009  |
| maize | 0.73 | spain  | europa        | dryland     | throughout | 0.60 | medium | farre & faci   | 2009  |
| wheat | 0.59 | china  | asia          | dryland     | throughout | 0.68 | medium | kang et al     | 2002  |
| wheat | 0.83 | china  | asia          | dryland     | vegetative | 0.94 | medium | kang et al     | 2002  |
| wheat | 0.73 | china  | asia          | dryland     | generative | 0.34 | medium | kang et al     | 2002  |
| wheat | 0.83 | china  | asia          | dryland     | generative | 0.62 | medium | kang et al     | 2002  |
| wheat | 0.72 | china  | asia          | dryland     | throughout | 0.50 | medium | kang et al     | 2002  |
| wheat | 0.83 | china  | asia          | dryland     | generative | 0.57 | medium | kang et al     | 2002  |
| wheat | 0.81 | china  | asia          | dryland     | generative | 0.77 | medium | kang et al     | 2002  |
| wheat | 0.86 | china  | asia          | dryland     | generative | 0.85 | medium | kang et al     | 2002  |
| wheat | 0.87 | china  | asia          | dryland     | generative | 0.58 | medium | kang et al     | 2002  |
| wheat | 0.87 | china  | asia          | dryland     | generative | 0.72 | medium | kang et al     | 2002  |
| wheat | 0.78 | china  | asia          | dryland     | vegetative | 0.76 | medium | kang et al     | 2002  |
| wheat | 1.02 | china  | asia          | dryland     | throughout | 0.85 | medium | kang et al     | 2002  |
| wheat | 1.06 | china  | asia          | dryland     | generative | 0.93 | medium | kang et al     | 2002  |
| wheat | 1.08 | china  | asia          | dryland     | vegetative | 0.91 | medium | kang et al     | 2002  |
| wheat | 0.42 | china  | asia          | dryland     | throughout | 0.34 | medium | kang et al     | 2002  |
| wheat | 0.76 | china  | asia          | dryland     | vegetative | 0.57 | medium | kang et al     | 2002  |
| wheat | 0.80 | china  | asia          | dryland     | generative | 0.26 | medium | kang et al     | 2002  |
| wheat | 0.93 | china  | asia          | dryland     | generative | 0.66 | medium | kang et al     | 2002  |
| wheat | 0.85 | china  | asia          | dryland     | throughout | 0.41 | medium | kang et al     | 2002  |
| wheat | 0.83 | china  | asia          | dryland     | generative | 0.45 | medium | kang et al     | 2002  |
| wheat | 0.92 | china  | asia          | dryland     | generative | 0.59 | medium | kang et al     | 2002  |

|       |      |           |               |             |            |      |        |                    |      |
|-------|------|-----------|---------------|-------------|------------|------|--------|--------------------|------|
| wheat | 0.96 | china     | asia          | dryland     | generative | 0.69 | medium | kang et al         | 2002 |
| wheat | 0.97 | china     | asia          | dryland     | generative | 0.53 | medium | kang et al         | 2002 |
| wheat | 1.01 | china     | asia          | dryland     | generative | 0.66 | medium | kang et al         | 2002 |
| wheat | 1.01 | china     | asia          | dryland     | vegetative | 0.74 | medium | kang et al         | 2002 |
| wheat | 1.10 | china     | asia          | dryland     | throughout | 0.74 | medium | kang et al         | 2002 |
| wheat | 1.14 | china     | asia          | dryland     | generative | 0.94 | medium | kang et al         | 2002 |
| wheat | 1.17 | china     | asia          | dryland     | vegetative | 0.96 | medium | kang et al         | 2002 |
| wheat | 0.40 | china     | asia          | dryland     | throughout | 0.68 | medium | kang et al         | 2002 |
| wheat | 0.75 | china     | asia          | dryland     | vegetative | 0.84 | medium | kang et al         | 2002 |
| wheat | 0.50 | china     | asia          | dryland     | generative | 0.29 | medium | kang et al         | 2002 |
| wheat | 0.44 | china     | asia          | dryland     | generative | 0.63 | medium | kang et al         | 2002 |
| wheat | 1.00 | china     | asia          | dryland     | throughout | 0.66 | medium | kang et al         | 2002 |
| wheat | 0.50 | china     | asia          | dryland     | generative | 0.50 | medium | kang et al         | 2002 |
| wheat | 0.75 | china     | asia          | dryland     | generative | 0.72 | medium | kang et al         | 2002 |
| wheat | 0.69 | china     | asia          | dryland     | generative | 0.77 | medium | kang et al         | 2002 |
| wheat | 0.76 | china     | asia          | dryland     | generative | 0.60 | medium | kang et al         | 2002 |
| wheat | 0.95 | china     | asia          | dryland     | generative | 0.75 | medium | kang et al         | 2002 |
| wheat | 0.50 | china     | asia          | dryland     | vegetative | 0.73 | medium | kang et al         | 2002 |
| wheat | 1.17 | china     | asia          | dryland     | throughout | 0.78 | medium | kang et al         | 2002 |
| wheat | 1.18 | china     | asia          | dryland     | generative | 0.97 | medium | kang et al         | 2002 |
| wheat | 1.18 | china     | asia          | dryland     | vegetative | 0.92 | medium | kang et al         | 2002 |
| maize | 0.09 | mexico    | south america | non-dryland | generative | n/a  | fine   | bolanos & edmeades | 1993 |
| maize | 0.30 | mexico    | south america | non-dryland | generative | n/a  | fine   | edmeades et al     | 1999 |
| maize | 0.00 | australia | australia     | non-dryland | generative | 0.40 | medium | carberry et al     | 1989 |
| maize | 0.10 | australia | australia     | non-dryland | generative | 0.44 | medium | carberry et al     | 1989 |
| maize | 0.96 | australia | australia     | non-dryland | generative | 0.86 | medium | carberry et al     | 1989 |
| maize | 0.73 | australia | australia     | non-dryland | generative | 0.46 | medium | carberry et al     | 1989 |
| maize | 0.68 | australia | australia     | non-dryland | vegetative | 0.74 | medium | carberry et al     | 1989 |
| maize | 0.22 | australia | australia     | non-dryland | generative | 0.70 | medium | carberry et al     | 1989 |
| maize | 0.89 | australia | australia     | non-dryland | vegetative | 0.51 | medium | carberry et al     | 1989 |
| maize | 0.52 | australia | australia     | non-dryland | generative | 0.21 | medium | carberry et al     | 1989 |
| maize | 0.77 | venezuela | south america | non-dryland | vegetative | n/a  | medium | sobrado            | 1990 |
| maize | 0.57 | venezuela | south america | non-dryland | vegetative | n/a  | medium | sobrado            | 1990 |
| maize | 0.88 | iran      | asia          | dryland     | vegetative | n/a  | fine   | ghooshchi et al    | 2008 |
| maize | 0.58 | iran      | asia          | dryland     | generative | n/a  | fine   | ghooshchi et al    | 2008 |
| maize | 0.85 | iran      | asia          | dryland     | generative | n/a  | fine   | ghooshchi et al    | 2008 |
| maize | 1.00 | USA       | north america | dryland     | vegetative | 0.89 | medium | gordon et al       | 1995 |
| maize | 0.67 | USA       | north america | dryland     | generative | 0.77 | medium | gordon et al       | 1995 |
| maize | 0.51 | USA       | north america | dryland     | generative | 0.66 | medium | gordon et al       | 1995 |
| maize | 0.84 | USA       | north america | dryland     | throughout | 0.67 | medium | gordon et al       | 1995 |
| maize | 1.03 | USA       | north america | dryland     | vegetative | 0.85 | medium | gordon et al       | 1995 |
| maize | 0.63 | USA       | north america | dryland     | generative | 0.55 | medium | gordon et al       | 1995 |
| maize | 0.21 | USA       | north america | dryland     | generative | 0.43 | medium | gordon et al       | 1995 |
| maize | 0.89 | USA       | north america | dryland     | throughout | 0.67 | medium | gordon et al       | 1995 |
| maize | 1.01 | USA       | north america | dryland     | vegetative | 0.92 | medium | gordon et al       | 1995 |
| maize | 0.78 | USA       | north america | dryland     | generative | 0.85 | medium | gordon et al       | 1995 |
| maize | 0.57 | USA       | north america | dryland     | generative | 0.77 | medium | gordon et al       | 1995 |
| maize | 0.97 | USA       | north america | dryland     | throughout | 0.67 | medium | gordon et al       | 1995 |
| maize | 1.00 | USA       | north america | dryland     | generative | 0.91 | medium | gordon et al       | 1995 |
| maize | 0.92 | USA       | north america | dryland     | generative | 0.82 | medium | gordon et al       | 1995 |
| maize | 0.77 | USA       | north america | dryland     | throughout | 0.67 | medium | gordon et al       | 1995 |
| maize | 1.00 | USA       | north america | dryland     | generative | 0.88 | medium | gordon et al       | 1995 |
| maize | 0.98 | USA       | north america | dryland     | generative | 0.77 | medium | gordon et al       | 1995 |
| maize | 0.97 | USA       | north america | dryland     | throughout | 0.67 | medium | gordon et al       | 1995 |
| maize | 1.00 | USA       | north america | dryland     | generative | 0.87 | medium | gordon et al       | 1995 |
| maize | 0.95 | USA       | north america | dryland     | generative | 0.75 | medium | gordon et al       | 1995 |
| maize | 0.79 | USA       | north america | dryland     | throughout | 0.67 | medium | gordon et al       | 1995 |
| maize | 1.04 | USA       | north america | dryland     | generative | 0.91 | medium | gordon et al       | 1995 |
| maize | 1.00 | USA       | north america | dryland     | generative | 0.82 | medium | gordon et al       | 1995 |
| maize | 0.37 | USA       | north america | dryland     | throughout | 0.73 | medium | gordon et al       | 1995 |
| maize | 0.94 | USA       | north america | dryland     | generative | 0.90 | medium | gordon et al       | 1995 |
| maize | 0.89 | USA       | north america | dryland     | generative | 0.81 | medium | gordon et al       | 1995 |
| maize | 0.67 | USA       | north america | dryland     | throughout | 0.71 | medium | gordon et al       | 1995 |
| maize | 0.88 | USA       | north america | dryland     | generative | 0.90 | medium | gordon et al       | 1995 |
| maize | 0.68 | USA       | north america | dryland     | generative | 0.79 | medium | gordon et al       | 1995 |
| maize | 0.11 | USA       | north america | dryland     | throughout | 0.69 | medium | gordon et al       | 1995 |
| maize | 0.90 | USA       | north america | dryland     | generative | 0.89 | medium | gordon et al       | 1995 |
| maize | 0.63 | USA       | north america | dryland     | generative | 0.78 | medium | gordon et al       | 1995 |
| maize | 0.32 | USA       | north america | dryland     | throughout | 0.67 | medium | gordon et al       | 1995 |
| maize | 0.95 | USA       | north america | dryland     | generative | 0.91 | medium | gordon et al       | 1995 |
| maize | 0.90 | USA       | north america | dryland     | generative | 0.82 | medium | gordon et al       | 1995 |
| maize | 0.28 | USA       | north america | dryland     | throughout | 0.73 | medium | gordon et al       | 1995 |
| maize | 1.00 | USA       | north america | dryland     | generative | 0.91 | medium | gordon et al       | 1995 |
| maize | 0.87 | USA       | north america | dryland     | generative | 0.82 | medium | gordon et al       | 1995 |
| maize | 0.71 | USA       | north america | dryland     | throughout | 0.73 | medium | gordon et al       | 1995 |
| maize | 0.92 | USA       | north america | dryland     | generative | 0.90 | medium | gordon et al       | 1995 |
| maize | 0.91 | USA       | north america | dryland     | generative | 0.80 | medium | gordon et al       | 1995 |
| maize | 0.69 | USA       | north america | dryland     | throughout | 0.70 | medium | gordon et al       | 1995 |
| maize | 0.96 | USA       | north america | dryland     | generative | 0.88 | medium | gordon et al       | 1995 |
| maize | 0.81 | USA       | north america | dryland     | generative | 0.75 | medium | gordon et al       | 1995 |

|       |      |          |               |             |            |      |        |                         |      |
|-------|------|----------|---------------|-------------|------------|------|--------|-------------------------|------|
| maize | 0.43 | USA      | north america | dryland     | throughout | 0.63 | medium | gordon et al            | 1995 |
| maize | 0.97 | USA      | north america | dryland     | generative | 0.90 | medium | gordon et al            | 1995 |
| maize | 0.88 | USA      | north america | dryland     | generative | 0.80 | medium | gordon et al            | 1995 |
| maize | 0.30 | USA      | north america | dryland     | throughout | 0.70 | medium | gordon et al            | 1995 |
| maize | 0.98 | USA      | north america | dryland     | generative | 0.91 | medium | gordon et al            | 1995 |
| maize | 0.88 | USA      | north america | dryland     | generative | 0.81 | medium | gordon et al            | 1995 |
| maize | 0.31 | USA      | north america | dryland     | throughout | 0.72 | medium | gordon et al            | 1995 |
| maize | 0.95 | USA      | north america | dryland     | generative | 0.87 | medium | gordon et al            | 1995 |
| maize | 0.80 | USA      | north america | dryland     | generative | 0.74 | medium | gordon et al            | 1995 |
| maize | 0.02 | USA      | north america | dryland     | throughout | 0.61 | medium | gordon et al            | 1995 |
| maize | 1.02 | USA      | north america | non-dryland | throughout | 0.87 | coarse | vories et al            | 2009 |
| maize | 0.75 | USA      | north america | non-dryland | throughout | 0.57 | coarse | vories et al            | 2009 |
| maize | 1.05 | USA      | north america | non-dryland | throughout | 0.89 | coarse | vories et al            | 2009 |
| maize | 0.97 | USA      | north america | non-dryland | throughout | 0.68 | coarse | vories et al            | 2009 |
| maize | 0.99 | USA      | north america | non-dryland | throughout | 0.93 | coarse | vories et al            | 2009 |
| maize | 0.94 | USA      | north america | non-dryland | throughout | 0.77 | coarse | vories et al            | 2009 |
| maize | 0.99 | USA      | north america | dryland     | throughout | 0.94 | medium | howell et al            | 1995 |
| maize | 0.84 | USA      | north america | dryland     | throughout | 0.88 | medium | howell et al            | 1995 |
| maize | 0.78 | USA      | north america | dryland     | throughout | 0.85 | medium | howell et al            | 1995 |
| maize | 0.66 | USA      | north america | dryland     | throughout | 0.75 | medium | howell et al            | 1995 |
| maize | 0.48 | USA      | north america | dryland     | throughout | 0.68 | medium | howell et al            | 1995 |
| maize | 0.96 | USA      | north america | dryland     | throughout | 0.87 | medium | howell et al            | 1995 |
| maize | 0.83 | USA      | north america | dryland     | throughout | 0.88 | medium | howell et al            | 1995 |
| maize | 0.70 | USA      | north america | dryland     | throughout | 0.92 | medium | howell et al            | 1995 |
| maize | 0.50 | USA      | north america | dryland     | throughout | 0.75 | medium | howell et al            | 1995 |
| maize | 0.26 | USA      | north america | dryland     | throughout | 0.59 | medium | howell et al            | 1995 |
| maize | 0.89 | USA      | north america | dryland     | throughout | 0.33 | medium | tolk et al              | 1998 |
| maize | 0.89 | USA      | north america | dryland     | throughout | 0.33 | medium | tolk et al              | 1998 |
| maize | 0.84 | USA      | north america | dryland     | throughout | 0.33 | coarse | tolk et al              | 1998 |
| maize | 0.90 | USA      | north america | dryland     | throughout | 0.63 | medium | tolk et al              | 1998 |
| maize | 0.97 | USA      | north america | dryland     | throughout | 0.63 | medium | tolk et al              | 1998 |
| maize | 0.78 | USA      | north america | dryland     | throughout | 0.63 | coarse | tolk et al              | 1998 |
| maize | 0.98 | USA      | north america | dryland     | throughout | 0.75 | medium | tolk et al              | 1998 |
| maize | 0.85 | USA      | north america | dryland     | throughout | 0.49 | medium | tolk et al              | 1998 |
| maize | 0.62 | USA      | north america | dryland     | throughout | 0.23 | medium | tolk et al              | 1998 |
| maize | 0.95 | USA      | north america | dryland     | throughout | 0.74 | medium | tolk et al              | 1998 |
| maize | 0.93 | USA      | north america | dryland     | throughout | 0.49 | medium | tolk et al              | 1998 |
| maize | 0.77 | USA      | north america | dryland     | throughout | 0.23 | medium | tolk et al              | 1998 |
| maize | 0.97 | USA      | north america | dryland     | throughout | 0.74 | coarse | tolk et al              | 1998 |
| maize | 0.91 | USA      | north america | dryland     | throughout | 0.49 | coarse | tolk et al              | 1998 |
| maize | 0.73 | USA      | north america | dryland     | throughout | 0.23 | coarse | tolk et al              | 1998 |
| maize | 0.82 | USA      | north america | dryland     | throughout | n/a  | medium | mason et al             | 2008 |
| wheat | 0.58 | mexico   | south america | dryland     | generative | 0.33 | coarse | monneveux et al         | 2005 |
| wheat | 0.63 | mexico   | south america | dryland     | vegetative | 0.44 | coarse | monneveux et al         | 2005 |
| wheat | 0.49 | mexico   | south america | dryland     | throughout | 0.11 | coarse | monneveux et al         | 2005 |
| wheat | 0.64 | mexico   | south america | dryland     | generative | 0.33 | coarse | monneveux et al         | 2005 |
| wheat | 0.69 | mexico   | south america | dryland     | vegetative | 0.44 | coarse | monneveux et al         | 2005 |
| wheat | 0.62 | mexico   | south america | dryland     | throughout | 0.11 | coarse | monneveux et al         | 2005 |
| maize | 0.95 | iran     | asia          | dryland     | generative | n/a  | n/a    | gholamin & khayatnezhad | 2011 |
| maize | 0.66 | turkey   | asia          | dryland     | throughout | 0.98 | medium | kara & biber            | 2008 |
| maize | 0.74 | turkey   | asia          | dryland     | throughout | 0.99 | medium | kara & biber            | 2008 |
| maize | 0.27 | turkey   | asia          | dryland     | throughout | 0.68 | medium | kara & biber            | 2008 |
| wheat | 0.69 | iran     | asia          | dryland     | throughout | n/a  | n/a    | naserian et al          | 2007 |
| wheat | 0.57 | iran     | asia          | dryland     | generative | n/a  | n/a    | dadbakhsh et al         | 2011 |
| wheat | 0.89 | iran     | asia          | dryland     | generative | n/a  | coarse | khamssi                 | 2011 |
| wheat | 0.85 | iran     | asia          | dryland     | generative | n/a  | medium | eskandari & kazemi      | 2010 |
| maize | 0.92 | spain    | europa        | dryland     | generative | 0.51 | coarse | aguilar et al           | 2007 |
| maize | 0.97 | spain    | europa        | dryland     | generative | 0.64 | coarse | aguilar et al           | 2007 |
| maize | 0.62 | spain    | europa        | dryland     | generative | 0.66 | coarse | aguilar et al           | 2007 |
| maize | 0.73 | spain    | europa        | dryland     | generative | 0.62 | coarse | aguilar et al           | 2007 |
| maize | 0.42 | ethiopia | africa        | dryland     | throughout | 0.25 | medium | Mengiste & Tilahun      | 2009 |
| maize | 0.97 | ethiopia | africa        | dryland     | vegetative | 0.92 | medium | Mengiste & Tilahun      | 2009 |
| maize | 0.94 | ethiopia | africa        | dryland     | vegetative | 0.84 | medium | Mengiste & Tilahun      | 2009 |
| maize | 0.79 | ethiopia | africa        | dryland     | generative | 0.60 | medium | Mengiste & Tilahun      | 2009 |
| maize | 0.97 | ethiopia | africa        | dryland     | generative | 0.89 | medium | Mengiste & Tilahun      | 2009 |
| maize | 0.97 | ethiopia | africa        | dryland     | vegetative | 0.95 | medium | Mengiste & Tilahun      | 2009 |
| maize | 0.96 | ethiopia | africa        | dryland     | vegetative | 0.90 | medium | Mengiste & Tilahun      | 2009 |
| maize | 0.86 | ethiopia | africa        | dryland     | generative | 0.73 | medium | Mengiste & Tilahun      | 2009 |
| maize | 0.96 | ethiopia | africa        | dryland     | generative | 0.93 | medium | Mengiste & Tilahun      | 2009 |
| maize | 0.77 | USA      | north america | dryland     | throughout | 0.46 | medium | van donk et al          | 2012 |
| maize | 0.84 | USA      | north america | dryland     | throughout | 0.58 | medium | van donk et al          | 2012 |
| maize | 0.95 | USA      | north america | dryland     | throughout | 0.79 | medium | van donk et al          | 2012 |
| maize | 0.95 | USA      | north america | dryland     | generative | 0.75 | medium | van donk et al          | 2012 |
| maize | 0.94 | USA      | north america | dryland     | generative | 0.75 | medium | van donk et al          | 2012 |
| maize | 0.97 | USA      | north america | dryland     | generative | 0.86 | medium | van donk et al          | 2012 |
| maize | 1.00 | USA      | north america | dryland     | generative | 0.86 | medium | van donk et al          | 2012 |
| maize | 0.75 | USA      | north america | dryland     | throughout | 0.56 | medium | van donk et al          | 2012 |
| maize | 0.95 | USA      | north america | dryland     | throughout | 0.71 | medium | van donk et al          | 2012 |
| maize | 0.99 | USA      | north america | dryland     | throughout | 0.86 | medium | van donk et al          | 2012 |
| maize | 1.00 | USA      | north america | dryland     | generative | 0.83 | medium | van donk et al          | 2012 |

|       |      |         |               |             |            |      |        |                                     |      |
|-------|------|---------|---------------|-------------|------------|------|--------|-------------------------------------|------|
| maize | 1.01 | USA     | north america | dryland     | generative | 0.85 | medium | van donk et al                      | 2012 |
| maize | 1.00 | USA     | north america | dryland     | generative | 0.89 | medium | van donk et al                      | 2012 |
| maize | 0.98 | USA     | north america | dryland     | generative | 0.95 | medium | van donk et al                      | 2012 |
| maize | 1.02 | USA     | north america | dryland     | throughout | 0.58 | medium | van donk et al                      | 2012 |
| maize | 0.98 | USA     | north america | dryland     | throughout | 0.59 | medium | van donk et al                      | 2012 |
| maize | 1.00 | USA     | north america | dryland     | throughout | 0.80 | medium | van donk et al                      | 2012 |
| maize | 0.98 | USA     | north america | dryland     | generative | 0.75 | medium | van donk et al                      | 2012 |
| maize | 1.05 | USA     | north america | dryland     | generative | 0.59 | medium | van donk et al                      | 2012 |
| maize | 0.99 | USA     | north america | dryland     | generative | 0.94 | medium | van donk et al                      | 2012 |
| wheat | 0.62 | denmark | europa        | non-dryland | throughout | n/a  | coarse | imtiyaz et al                       | 1982 |
| wheat | 0.52 | denmark | europa        | non-dryland | throughout | 0.50 | coarse | talukder et al; mogensen & talukder | 1987 |
| wheat | 1.00 | denmark | europa        | non-dryland | vegetative | 0.83 | coarse | talukder et al; mogensen & talukder | 1987 |
| wheat | 0.88 | denmark | europa        | non-dryland | generative | 0.75 | coarse | talukder et al; mogensen & talukder | 1987 |
| wheat | 0.72 | denmark | europa        | non-dryland | generative | 0.50 | coarse | talukder et al; mogensen & talukder | 1987 |
| wheat | 1.06 | india   | asia          | dryland     | throughout | 0.22 | coarse | aggarwal & sinha                    | 1987 |
| wheat | 0.23 | india   | asia          | dryland     | throughout | 0.31 | coarse | aggarwal & sinha                    | 1987 |
| wheat | 0.39 | india   | asia          | dryland     | throughout | 0.40 | coarse | aggarwal & sinha                    | 1987 |
| wheat | 0.33 | india   | asia          | dryland     | throughout | 0.35 | coarse | aggarwal & sinha                    | 1987 |
| wheat | 0.43 | india   | asia          | dryland     | throughout | 0.44 | coarse | aggarwal & sinha                    | 1987 |
| wheat | 0.60 | india   | asia          | dryland     | throughout | 0.53 | coarse | aggarwal & sinha                    | 1987 |
| maize | 0.71 | USA     | north america | dryland     | generative | 0.70 | medium | jama & ottman                       | 1993 |
| maize | 0.62 | USA     | north america | dryland     | generative | 0.69 | medium | jama & ottman                       | 1993 |
| maize | 0.58 | USA     | north america | dryland     | generative | 0.66 | medium | jama & ottman                       | 1993 |
| maize | 0.56 | USA     | north america | dryland     | generative | 0.78 | medium | jama & ottman                       | 1993 |
| maize | 0.62 | USA     | north america | dryland     | generative | 0.77 | medium | jama & ottman                       | 1993 |
| maize | 0.67 | USA     | north america | dryland     | generative | 0.76 | medium | jama & ottman                       | 1993 |
| wheat | 0.88 | iran    | asia          | dryland     | throughout | 0.86 | medium | fardad & pessarakli                 | 1995 |
| wheat | 0.86 | iran    | asia          | dryland     | throughout | 0.73 | medium | fardad & pessarakli                 | 1995 |
| wheat | 0.67 | iran    | asia          | dryland     | throughout | 0.60 | medium | fardad & pessarakli                 | 1995 |
| wheat | 0.55 | iran    | asia          | dryland     | throughout | 0.46 | medium | fardad & pessarakli                 | 1995 |
| wheat | 0.34 | iran    | asia          | dryland     | throughout | 0.33 | medium | fardad & pessarakli                 | 1995 |
| wheat | 0.95 | iran    | asia          | dryland     | throughout | 0.87 | medium | fardad & pessarakli                 | 1995 |
| wheat | 0.79 | iran    | asia          | dryland     | throughout | 0.74 | medium | fardad & pessarakli                 | 1995 |
| wheat | 0.67 | iran    | asia          | dryland     | throughout | 0.62 | medium | fardad & pessarakli                 | 1995 |
| wheat | 0.58 | iran    | asia          | dryland     | throughout | 0.49 | medium | fardad & pessarakli                 | 1995 |
| wheat | 0.40 | iran    | asia          | dryland     | throughout | 0.36 | medium | fardad & pessarakli                 | 1995 |
| maize | 0.37 | brazil  | south america | non-dryland | generative | n/a  | medium | de souza et al                      | 2013 |
| maize | 0.70 | brazil  | south america | non-dryland | generative | n/a  | medium | de souza et al                      | 2013 |
| maize | 0.42 | nigeria | africa        | non-dryland | generative | n/a  | fine   | menkir et al                        | 2009 |
| maize | 1.02 | USA     | north america | non-dryland | throughout | 0.83 | coarse | powell & wright                     | 1993 |
| maize | 0.85 | USA     | north america | non-dryland | throughout | 0.78 | coarse | powell & wright                     | 1993 |
| maize | 0.75 | USA     | north america | non-dryland | throughout | 0.64 | coarse | powell & wright                     | 1993 |
| maize | 0.28 | USA     | north america | non-dryland | throughout | 0.35 | coarse | powell & wright                     | 1993 |
| maize | 1.01 | USA     | north america | non-dryland | throughout | 0.68 | coarse | powell & wright                     | 1993 |
| maize | 0.72 | USA     | north america | non-dryland | throughout | 0.44 | coarse | powell & wright                     | 1993 |
| maize | 1.01 | USA     | north america | non-dryland | throughout | 0.69 | coarse | powell & wright                     | 1993 |
| maize | 1.07 | USA     | north america | non-dryland | throughout | 0.34 | coarse | powell & wright                     | 1993 |
| maize | 0.99 | USA     | north america | non-dryland | throughout | 0.64 | coarse | powell & wright                     | 1993 |
| maize | 0.61 | USA     | north america | non-dryland | throughout | 0.39 | coarse | powell & wright                     | 1993 |
