# Supplementary material for: Global Synthesis of Drought Effects on Maize and Wheat Production
Source: PLOS journal article supplement (doi:10.1371/journal.pone.0156362), 2016-05-25
Supplement: S1 (10.1371/journal.pone.0156362.s001) [file journal.pone.0156362.s001]

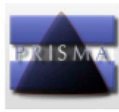

## PRISMA 2009 Flow Diagram

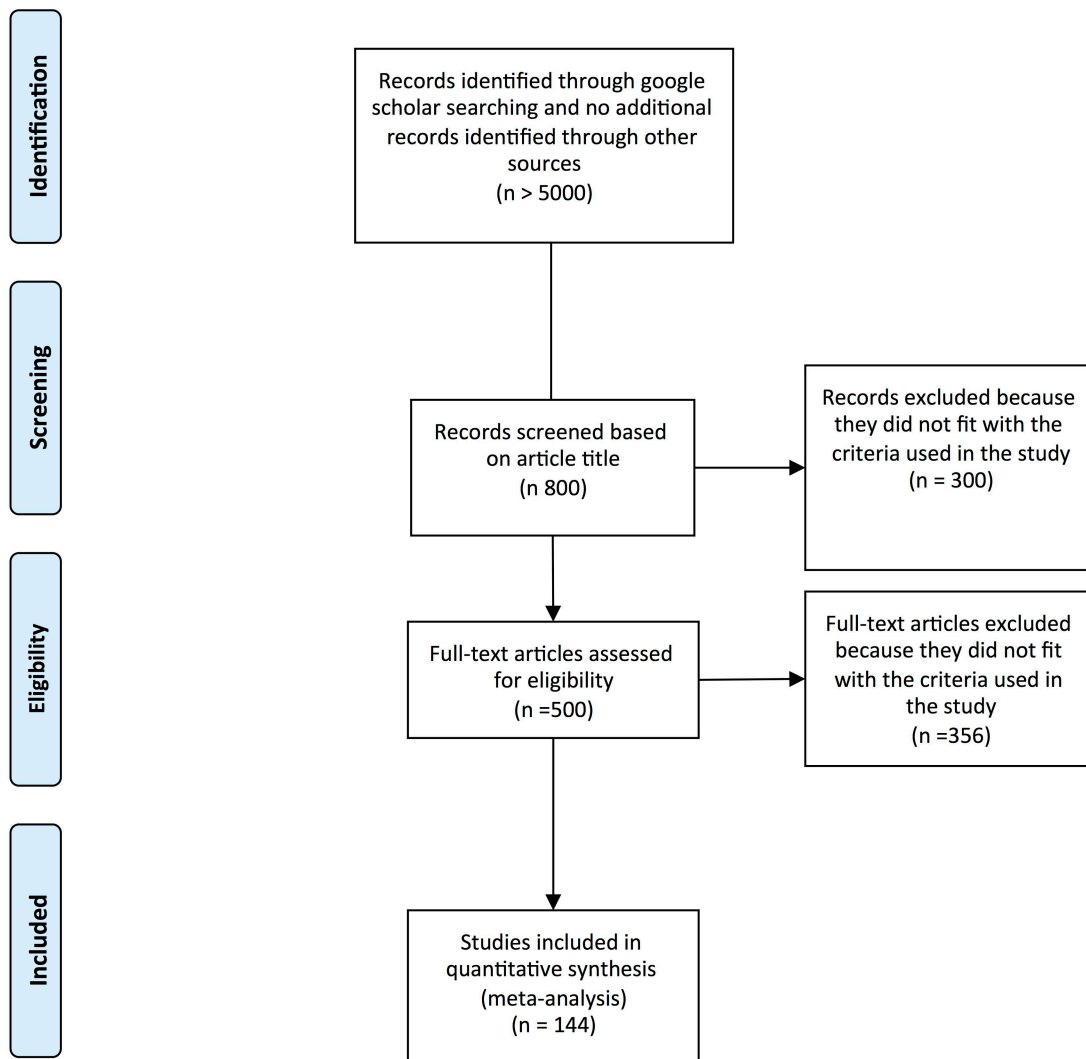

From: Moher D, Liberati A, Tetzlaff J, Altman DG, The PRISMA Group (2009). Preferred Reporting Items for Systematic Reviews and Meta Analysis. The PRISMA Statement 6(6): e1000097. doi: 10.1371/journal.pmed1000097

For more information, visit [www.prisma-statement.org](http://www.prisma-statement.org)
